# Supplementary material for: High-Resolution Phenotypic Profiling Defines Genes Essential for Mycobacterial Growth and Cholesterol Catabolism
Source: PLoS Pathog. 2011 Sep 29;7(9):e1002251. doi: 10.1371/journal.ppat.1002251 (PMC3182942; doi:10.1371/journal.ppat.1002251)
Supplement: Table S2 — Analysis of essentiality in vitro . (XLSX) [file ppat.1002251.s002.xlsx]

## Sheet: supp table 2
Table S2. Analysis of essentiality in vitro
"Total TA's" = total # of TAs in entire ORF
"Expected Run of Unoccupied Sites" = Longest sequence of consecutive TA sites that would be expected to lack transposon insertions in the absence of selection
"Max Run of Unoccupied sites" = actual number of sequential TA sites without a sequenced insertion
"p value" = Probability of the "max run of unoccupied sites" occurring in the absence of selection.
"in vitro essential" = prediction from previous microarray mapping study (Sassetti et al. Mol Micro 48:77-84)
				Expected Run of	Max Run of		in vitro essential
Locus	Gene Name	Totals TA's	Total Insertions	Unoccupied Sites	Unoccupied Sites	p value	(Sassetti et al 2003)
Rv0001	dnaA	32	1	4.365	31	0	essential
Rv0002	dnaN	31	0	4.319	31	0	no-data
Rv0003	recF	35	11	4.495	7	0.13067	non-essential
Rv0004	-	8	2	2.353	6	0.06177	non-essential
Rv0005	gyrB	43	3	4.794	40	0	essential
Rv0006	gyrA	46	2	4.892	44	0	no-data
Rv0007	-	11	4	2.815	5	0.16024	no-data
Rv0008c	-	4	3	1.348	1	0.63211	non-essential
Rv0009	ppiA	7	7	2.16	0	0.96938	non-essential
Rv0010c	-	10	6	2.677	3	0.46741	non-essential
Rv0011c	-	3	0	0.93	3	0.17221	non-essential
Rv0012	-	16	11	3.359	3	0.63505	non-essential
Rv0013	trpG	15	1	3.265	14	0.00048	no-data
Rv0014c	pknB	24	0	3.947	24	0	essential
Rv0015c	pknA	16	1	3.359	15	0.00026	essential
Rv0016c	pbpA	36	10	4.536	7	0.13414	non-essential
Rv0017c	rodA	27	11	4.118	7	0.10239	non-essential
Rv0018c	ppp	25	7	4.007	12	0.00318	non-essential
Rv0019c	-	13	8	3.058	2	0.80436	non-essential
Rv0020c	TB39.8	52	7	5.069	43	0	non-essential
Rv0021c	-	23	19	3.886	2	0.94423	non-essential
Rv0022c	whiB5	8	8	2.353	0	0.98139	non-essential
Rv0023	-	12	0	2.942	12	0.00153	non-essential
Rv0024	-	13	11	3.058	1	0.96122	non-essential
Rv0025	-	8	7	2.353	1	0.86466	non-essential
Rv0026	-	15	11	3.265	1	0.97648	non-essential
Rv0027	-	5	2	1.671	2	0.46607	non-essential
Rv0028	-	5	2	1.671	3	0.27021	no-data
Rv0029	-	19	15	3.609	1	0.99135	non-essential
Rv0030	-	5	1	1.671	3	0.27021	non-essential
Rv0031	-	1	0	-0.664	1	0.2212	non-essential
Rv0032	bioF2	57	28	5.203	12	0.00724	non-essential
Rv0033	acpA	3	3	0.93	0	0.77553	non-essential
Rv0034	-	5	4	1.671	1	0.71349	non-essential
Rv0035	fadD34	25	22	4.007	1	0.99807	non-essential
Rv0036c	-	4	4	1.348	0	0.86358	non-essential
Rv0037c	-	21	13	3.754	4	0.48529	non-essential
Rv0038	-	8	6	2.353	1	0.86466	non-essential
Rv0039c	-	4	2	1.348	2	0.39468	non-essential
Rv0040c	mtc28	10	5	2.677	3	0.46741	non-essential
Rv0041	leuS	73	1	5.562	72	0	essential
Rv0042c	-	5	3	1.671	1	0.71349	no-data
Rv0043c	-	11	8	2.815	1	0.93607	non-essential
Rv0044c	-	20	16	3.683	1	0.99326	non-essential
Rv0045c	-	7	7	2.16	0	0.96938	non-essential
Rv0046c	ino1	17	0	3.447	17	7e-05	non-essential
Rv0047c	-	8	3	2.353	2	0.63358	non-essential
Rv0048c	-	16	15	3.359	1	0.98168	non-essential
Rv0049	-	9	6	2.524	1	0.8946	non-essential
Rv0050	ponA1	37	12	4.576	10	0.01855	non-essential
Rv0051	-	34	19	4.453	2	0.98598	non-essential
Rv0052	-	7	6	2.16	1	0.82622	non-essential
Rv0053	rpsF	7	0	2.16	7	0.02762	no-data
Rv0054	ssb	5	0	1.671	5	0.07631	no-data
Rv0055	rpsR	5	1	1.671	3	0.27021	no-data
Rv0056	rplI	8	6	2.353	2	0.63358	no-data
Rv0057	-	16	7	3.359	3	0.63505	no-data
Rv0058	dnaB	38	0	4.614	38	0	essential
Rv0059	-	21	15	3.754	2	0.92831	non-essential
Rv0060	-	23	1	3.886	22	0	essential
Rv0061	-	6	3	1.936	2	0.52904	non-essential
Rv0062	celA1	22	18	3.821	1	0.99591	non-essential
Rv0063	-	24	20	3.947	3	0.77953	non-essential
Rv0064	-	69	33	5.48	4	0.88721	non-essential
Rv0065	-	8	4	2.353	2	0.63358	non-essential
Rv0066c	icd2	38	1	4.614	25	0	non-essential
Rv0067c	-	12	4	2.942	5	0.17347	no-data
Rv0068	-	12	7	2.942	3	0.53046	non-essential
Rv0069c	sdaA	12	6	2.942	2	0.7782	non-essential
Rv0070c	glyA	18	11	3.53	3	0.67826	non-essential
Rv0071	-	8	5	2.353	3	0.39589	non-essential
Rv0072	-	17	13	3.447	3	0.65733	non-essential
Rv0073	-	16	15	3.359	1	0.98168	non-essential
Rv0074	-	20	11	3.683	3	0.71635	no-data
Rv0075	-	25	19	4.007	2	0.95661	non-essential
Rv0076c	-	3	3	0.93	0	0.77553	non-essential
Rv0077c	-	15	11	3.265	3	0.61132	non-essential
Rv0078	-	9	3	2.524	3	0.43278	no-data
Rv0078A	-	10	9	2.677	1	0.91791	no-data
Rv0079	-	14	11	3.165	1	0.9698	non-essential
Rv0080	-	5	3	1.671	1	0.71349	non-essential
Rv0081	-	6	5	1.936	1	0.77686	non-essential
Rv0082	-	7	4	2.16	3	0.35661	non-essential
Rv0083	-	23	17	3.886	3	0.76519	non-essential
Rv0084	hycD	9	8	2.524	1	0.8946	non-essential
Rv0085	hycP	4	2	1.348	2	0.39468	essential
Rv0086	hycQ	15	9	3.265	1	0.97648	essential
Rv0087	hycE	26	7	4.064	6	0.18716	no-data
Rv0088	-	14	3	3.165	8	0.02773	no-data
Rv0089	-	11	9	2.815	1	0.93607	no-data
Rv0090	-	12	8	2.942	1	0.95021	non-essential
Rv0091	mtn	11	8	2.815	2	0.74854	non-essential
Rv0092	ctpA	30	22	4.271	3	0.84893	non-essential
Rv0093c	-	8	4	2.353	2	0.63358	no-data
Rv0094c	-	n/a	n/a	n/a	n/a	n/a	non-essential
Rv0095c	-	9	3	2.524	5	0.13315	non-essential
Rv0096	PPE1	34	20	4.453	3	0.88258	no-data
Rv0097	-	26	15	4.064	2	0.96172	non-essential
Rv0098	-	12	6	2.942	3	0.53046	non-essential
Rv0099	fadD10	32	11	4.365	7	0.12017	non-essential
Rv0100	-	4	2	1.348	1	0.63211	non-essential
Rv0101	nrp	122	65	6.307	5	0.85585	non-essential
Rv0102	-	42	0	4.76	42	0	essential
Rv0103c	ctpB	31	24	4.319	2	0.97956	non-essential
Rv0104	-	28	20	4.171	3	0.82864	non-essential
Rv0105c	rpmB	5	3	1.671	1	0.71349	non-essential
Rv0106	-	12	9	2.942	1	0.95021	no-data
Rv0107c	ctpI	66	34	5.415	9	0.06438	non-essential
Rv0108c	-	2	2	0.342	0	0.63065	non-essential
Rv0109	PE_PGRS1	28	11	4.171	3	0.82864	no-data
Rv0110	-	13	11	3.058	1	0.96122	non-essential
Rv0111	-	43	28	4.794	4	0.74332	non-essential
Rv0112	gca	31	6	4.319	9	0.03077	essential
Rv0113	gmhA	13	3	3.058	4	0.3371	non-essential
Rv0114	gmhB	10	5	2.677	3	0.46741	non-essential
Rv0115	hddA	18	15	3.53	1	0.98889	non-essential
Rv0116c	-	18	16	3.53	1	0.98889	non-essential
Rv0117	oxyS	17	9	3.447	4	0.41588	non-essential
Rv0118c	oxcA	26	10	4.064	9	0.02587	essential
Rv0119	fadD7	14	0	3.165	14	0.00045	no-data
Rv0120c	fusA2	28	12	4.171	8	0.05468	no-data
Rv0121c	-	10	5	2.677	3	0.46741	non-essential
Rv0122	-	9	4	2.524	3	0.43278	non-essential
Rv0123	-	9	1	2.524	8	0.01791	non-essential
Rv0124	PE_PGRS2	14	7	3.165	2	0.82743	no-data
Rv0125	pepA	10	9	2.677	1	0.91791	no-data
Rv0126	treS	31	4	4.319	9	0.03077	growth-defect
Rv0127	-	30	1	4.271	29	0	essential
Rv0128	-	20	15	3.683	2	0.91873	non-essential
Rv0129c	fbpC	27	8	4.118	6	0.19361	non-essential
Rv0130	-	4	4	1.348	0	0.86358	non-essential
Rv0131c	fadE1	18	15	3.53	1	0.98889	non-essential
Rv0132c	fgd2	15	11	3.265	1	0.97648	non-essential
Rv0133	-	8	7	2.353	1	0.86466	non-essential
Rv0134	ephF	12	11	2.942	1	0.95021	non-essential
Rv0135c	-	11	6	2.815	2	0.74854	non-essential
Rv0136	cyp138	23	18	3.886	1	0.99682	non-essential
Rv0137c	msrA	11	8	2.815	1	0.93607	non-essential
Rv0138	-	7	7	2.16	0	0.96938	non-essential
Rv0139	-	12	11	2.942	1	0.95021	non-essential
Rv0140	-	16	8	3.359	6	0.11972	non-essential
Rv0141c	-	8	5	2.353	2	0.63358	non-essential
Rv0142	-	7	6	2.16	1	0.82622	non-essential
Rv0143c	-	28	20	4.171	2	0.97022	non-essential
Rv0144	-	14	11	3.165	1	0.9698	non-essential
Rv0145	-	15	9	3.265	3	0.61132	non-essential
Rv0146	-	17	14	3.447	1	0.98573	non-essential
Rv0147	-	26	23	4.064	1	0.9985	non-essential
Rv0148	-	17	16	3.447	1	0.98573	non-essential
Rv0149	-	22	14	3.821	6	0.16083	non-essential
Rv0150c	-	4	3	1.348	1	0.63211	no-data
Rv0151c	PE1	44	32	4.827	3	0.93746	non-essential
Rv0152c	PE2	40	33	4.689	1	0.99995	non-essential
Rv0153c	ptbB	11	5	2.815	3	0.49993	no-data
Rv0154c	fadE2	12	8	2.942	3	0.53046	non-essential
Rv0155	pntAa	11	6	2.815	2	0.74854	no-data
Rv0156	pntAb	1	1	-0.664	0	0.39226	non-essential
Rv0157	pntB	15	10	3.265	2	0.84779	non-essential
Rv0158	-	16	14	3.359	1	0.98168	non-essential
Rv0159c	PE3	50	41	5.013	2	0.99812	non-essential
Rv0160c	PE4	42	32	4.76	2	0.99486	non-essential
Rv0161	-	19	8	3.609	3	0.6979	no-data
Rv0162c	adhE1	17	9	3.447	2	0.88157	non-essential
Rv0163	-	11	10	2.815	1	0.93607	non-essential
Rv0164	TB18.5	9	2	2.524	7	0.03537	no-data
Rv0165c	-	8	5	2.353	2	0.63358	non-essential
Rv0166	fadD5	28	20	4.171	3	0.82864	non-essential
Rv0167	yrbE1A	7	6	2.16	1	0.82622	no-data
Rv0168	yrbE1B	15	13	3.265	1	0.97648	non-essential
Rv0169	mce1A	39	31	4.652	2	0.99251	non-essential
Rv0170	mce1B	18	14	3.53	2	0.89554	non-essential
Rv0171	mce1C	25	20	4.007	2	0.95661	non-essential
Rv0172	mce1D	33	26	4.41	1	0.99974	no-data
Rv0173	lprK	16	11	3.359	2	0.86574	non-essential
Rv0174	mce1F	31	23	4.319	2	0.97956	non-essential
Rv0175	-	9	7	2.524	1	0.8946	non-essential
Rv0176	-	15	12	3.265	1	0.97648	non-essential
Rv0177	-	12	9	2.942	1	0.95021	non-essential
Rv0178	-	12	9	2.942	1	0.95021	non-essential
Rv0179c	lprO	23	18	3.886	2	0.94423	non-essential
Rv0180c	-	29	16	4.222	5	0.36898	no-data
Rv0181c	-	16	12	3.359	1	0.98168	non-essential
Rv0182c	sigG	21	18	3.754	2	0.92831	non-essential
Rv0183	-	15	13	3.265	1	0.97648	non-essential
Rv0184	-	11	6	2.815	2	0.74854	non-essential
Rv0185	-	10	3	2.677	3	0.46741	non-essential
Rv0186	bglS	34	13	4.453	7	0.12718	no-data
Rv0187	-	8	4	2.353	3	0.39589	non-essential
Rv0188	-	11	8	2.815	1	0.93607	non-essential
Rv0189c	ilvD	23	0	3.886	23	0	essential
Rv0190	-	3	2	0.93	1	0.52763	non-essential
Rv0191	-	20	17	3.683	1	0.99326	non-essential
Rv0192	-	14	14	3.165	0	0.99906	non-essential
Rv0193c	-	35	29	4.495	2	0.98763	non-essential
Rv0194	-	56	44	5.177	2	0.99911	non-essential
Rv0195	-	6	6	1.936	0	0.94961	non-essential
Rv0196	-	7	7	2.16	0	0.96938	non-essential
Rv0197	-	34	16	4.453	6	0.23737	non-essential
Rv0198c	-	42	18	4.76	11	0.01061	non-essential
Rv0199	-	12	6	2.942	2	0.7782	no-data
Rv0200	-	8	3	2.353	3	0.39589	non-essential
Rv0201c	-	8	7	2.353	1	0.86466	non-essential
Rv0202c	mmpL11	39	18	4.652	4	0.7087	non-essential
Rv0203	-	4	4	1.348	0	0.86358	no-data
Rv0204c	-	20	5	3.683	12	0.00255	non-essential
Rv0205	-	13	8	3.058	2	0.80436	essential
Rv0206c	mmpL3	34	1	4.453	31	0	non-essential
Rv0207c	-	9	6	2.524	2	0.6768	non-essential
Rv0208c	trmB	12	2	2.942	8	0.02381	essential
Rv0209	-	15	11	3.265	2	0.84779	non-essential
Rv0210	-	13	9	3.058	2	0.80436	non-essential
Rv0211	pckA	25	2	4.007	23	0	no-data
Rv0212c	nadR	7	6	2.16	1	0.82622	non-essential
Rv0213c	-	31	26	4.319	1	0.99957	non-essential
Rv0214	fadD4	34	24	4.453	2	0.98598	non-essential
Rv0215c	fadE3	18	11	3.53	3	0.67826	non-essential
Rv0216	-	24	10	3.947	4	0.53188	non-essential
Rv0217c	lipW	21	13	3.754	3	0.73366	non-essential
Rv0218	-	19	15	3.609	2	0.90786	no-data
Rv0219	-	12	8	2.942	1	0.95021	non-essential
Rv0220	lipC	25	13	4.007	5	0.3276	non-essential
Rv0221	-	28	17	4.171	2	0.97022	no-data
Rv0222	echA1	9	4	2.524	3	0.43278	no-data
Rv0223c	-	25	12	4.007	5	0.3276	no-data
Rv0224c	-	16	1	3.359	15	0.00026	essential
Rv0225	-	20	0	3.683	20	1e-05	no-data
Rv0226c	-	30	2	4.271	28	0	essential
Rv0227c	-	24	0	3.947	24	0	essential
Rv0228	-	14	1	3.165	13	0.0009	essential
Rv0229c	-	17	8	3.447	7	0.06575	non-essential
Rv0230c	php	16	14	3.359	2	0.86574	non-essential
Rv0231	fadE4	37	33	4.576	1	0.9999	non-essential
Rv0232	-	9	9	2.524	0	0.98869	non-essential
Rv0233	nrdB	12	10	2.942	1	0.95021	non-essential
Rv0234c	gabD1	24	14	3.947	2	0.9508	no-data
Rv0235c	-	27	11	4.118	9	0.02686	non-essential
Rv0236A	-	4	1	1.348	3	0.22276	no-data
Rv0236c	-	40	1	4.689	39	0	essential
Rv0237	lpqI	14	4	3.165	3	0.58605	non-essential
Rv0238	-	13	1	3.058	7	0.05068	non-essential
Rv0239	-	2	2	0.342	0	0.63065	non-essential
Rv0240	-	9	6	2.524	2	0.6768	non-essential
Rv0241c	-	17	4	3.447	4	0.41588	non-essential
Rv0242c	fabG	11	1	2.815	6	0.08394	non-essential
Rv0243	fadA2	20	10	3.683	4	0.46875	non-essential
Rv0244c	fadE5	23	18	3.886	1	0.99682	no-data
Rv0245	-	5	5	1.671	0	0.91709	non-essential
Rv0246	-	34	19	4.453	4	0.6588	non-essential
Rv0247c	-	12	0	2.942	12	0.00153	no-data
Rv0248c	sdhA	39	3	4.652	24	0	no-data
Rv0249c	-	23	3	3.886	14	0.00074	non-essential
Rv0250c	-	4	2	1.348	1	0.63211	non-essential
Rv0251c	hsp	6	6	1.936	0	0.94961	non-essential
Rv0252	nirB	41	25	4.725	5	0.47844	non-essential
Rv0253	nirD	8	6	2.353	1	0.86466	non-essential
Rv0254c	cobU	6	5	1.936	1	0.77686	non-essential
Rv0255c	cobQ1	15	11	3.265	1	0.97648	non-essential
Rv0256c	PPE2	32	24	4.365	4	0.63652	non-essential
Rv0257	-	4	3	1.348	1	0.63211	no-data
Rv0258c	-	9	2	2.524	3	0.43278	non-essential
Rv0259c	-	7	4	2.16	1	0.82622	non-essential
Rv0260c	-	21	8	3.754	10	0.01057	non-essential
Rv0261c	narK3	25	13	4.007	7	0.09518	non-essential
Rv0262c	aac	8	5	2.353	2	0.63358	non-essential
Rv0263c	-	17	11	3.447	1	0.98573	non-essential
Rv0264c	-	9	8	2.524	1	0.8946	non-essential
Rv0265c	-	9	8	2.524	1	0.8946	non-essential
Rv0266c	oplA	43	34	4.794	2	0.99547	non-essential
Rv0267	narU	16	15	3.359	1	0.98168	non-essential
Rv0268c	-	13	11	3.058	1	0.96122	non-essential
Rv0269c	-	11	9	2.815	1	0.93607	non-essential
Rv0270	fadD2	26	23	4.064	1	0.9985	non-essential
Rv0271c	fadE6	35	29	4.495	1	0.99984	non-essential
Rv0272c	-	16	9	3.359	3	0.63505	non-essential
Rv0273c	-	17	9	3.447	3	0.65733	non-essential
Rv0274	-	9	5	2.524	2	0.6768	non-essential
Rv0275c	-	7	5	2.16	1	0.82622	no-data
Rv0276	-	18	14	3.53	1	0.98889	non-essential
Rv0277c	-	7	5	2.16	1	0.82622	non-essential
Rv0278c	PE_PGRS3	25	14	4.007	5	0.3276	no-data
Rv0279c	PE_PGRS4	18	14	3.53	2	0.89554	no-data
Rv0280	PPE3	26	23	4.064	3	0.80563	no-data
Rv0281	-	14	13	3.165	1	0.9698	non-essential
Rv0282	-	24	1	3.947	23	0	essential
Rv0283	-	24	0	3.947	24	0	essential
Rv0284	-	61	0	5.301	61	0	essential
Rv0285	PE5	5	0	1.671	5	0.07631	essential
Rv0286	PPE4	32	1	4.365	30	0	essential
Rv0287	esxG	5	0	1.671	5	0.07631	no-data
Rv0288	esxH	8	0	2.353	8	0.01594	non-essential
Rv0289	-	14	0	3.165	14	0.00045	essential
Rv0290	-	19	0	3.609	19	2e-05	essential
Rv0291	mycP3	13	0	3.058	13	0.00083	essential
Rv0292	-	17	2	3.447	15	0.00027	essential
Rv0293c	-	27	15	4.118	3	0.8175	non-essential
Rv0294	tam	15	8	3.265	4	0.37774	non-essential
Rv0295c	-	9	6	2.524	2	0.6768	non-essential
Rv0296c	-	43	28	4.794	5	0.49474	non-essential
Rv0297	PE_PGRS5	14	7	3.165	4	0.35774	non-essential
Rv0298	-	5	4	1.671	1	0.71349	non-essential
Rv0299	-	3	2	0.93	1	0.52763	non-essential
Rv0300	-	5	5	1.671	0	0.91709	non-essential
Rv0301	-	8	8	2.353	0	0.98139	non-essential
Rv0302	-	8	6	2.353	1	0.86466	non-essential
Rv0303	-	13	13	3.058	0	0.99846	non-essential
Rv0304c	PPE5	135	81	6.454	7	0.41732	non-essential
Rv0305c	PPE6	60	34	5.277	6	0.3801	non-essential
Rv0306	-	9	6	2.524	2	0.6768	non-essential
Rv0307c	-	8	6	2.353	2	0.63358	non-essential
Rv0308	-	16	8	3.359	3	0.63505	no-data
Rv0309	-	13	7	3.058	4	0.3371	no-data
Rv0310c	-	12	6	2.942	2	0.7782	non-essential
Rv0311	-	17	9	3.447	6	0.12671	essential
Rv0312	-	22	5	3.821	7	0.08426	essential
Rv0313	-	6	5	1.936	1	0.77686	non-essential
Rv0314c	-	7	6	2.16	1	0.82622	non-essential
Rv0315	-	11	7	2.815	2	0.74854	non-essential
Rv0316	-	8	6	2.353	1	0.86466	non-essential
Rv0317c	glpQ2	14	13	3.165	1	0.9698	non-essential
Rv0318c	-	8	7	2.353	1	0.86466	non-essential
Rv0319	pcp	9	6	2.524	1	0.8946	non-essential
Rv0320	-	16	13	3.359	1	0.98168	non-essential
Rv0321	dcd	7	6	2.16	1	0.82622	non-essential
Rv0322	udgA	24	14	3.947	4	0.53188	non-essential
Rv0323c	-	12	6	2.942	2	0.7782	non-essential
Rv0324	-	12	6	2.942	3	0.53046	non-essential
Rv0325	-	7	6	2.16	1	0.82622	non-essential
Rv0326	-	10	4	2.677	4	0.27113	non-essential
Rv0327c	cyp135A1	23	8	3.886	9	0.02292	no-data
Rv0328	-	11	6	2.815	3	0.49993	non-essential
Rv0329c	-	9	5	2.524	2	0.6768	non-essential
Rv0330c	-	10	9	2.677	1	0.91791	non-essential
Rv0331	-	18	14	3.53	2	0.89554	non-essential
Rv0332	-	13	12	3.058	1	0.96122	non-essential
Rv0333	-	4	3	1.348	1	0.63211	non-essential
Rv0334	rmlA	19	0	3.609	19	2e-05	essential
Rv0335c	PE6	3	1	0.93	1	0.52763	essential
Rv0336	-	1	0	-0.664	1	0.2212	non-essential
Rv0337c	aspC	23	1	3.886	22	0	essential
Rv0338c	-	37	1	4.576	36	0	essential
Rv0339c	-	30	17	4.271	3	0.84893	no-data
Rv0340	-	6	2	1.936	3	0.31477	non-essential
Rv0341	iniB	19	8	3.609	4	0.45168	non-essential
Rv0342	iniA	27	19	4.118	3	0.8175	non-essential
Rv0343	iniC	13	10	3.058	1	0.96122	no-data
Rv0344c	lpqJ	12	8	2.942	1	0.95021	non-essential
Rv0345	-	7	6	2.16	1	0.82622	non-essential
Rv0346c	ansP2	29	12	4.222	5	0.36898	non-essential
Rv0347	-	18	2	3.53	16	0.00015	essential
Rv0348	-	19	5	3.609	8	0.03744	non-essential
Rv0349	-	8	5	2.353	2	0.63358	non-essential
Rv0350	dnaK	17	0	3.447	17	7e-05	essential
Rv0351	grpE	10	1	2.677	9	0.01003	essential
Rv0352	dnaJ1	14	2	3.165	12	0.00178	essential
Rv0353	hspR	6	5	1.936	1	0.77686	non-essential
Rv0354c	PPE7	6	5	1.936	1	0.77686	non-essential
Rv0355c	PPE8	167	124	6.762	4	0.99492	no-data
Rv0356c	-	10	8	2.677	1	0.91791	non-essential
Rv0357c	purA	24	0	3.947	24	0	essential
Rv0358	-	14	2	3.165	11	0.00355	no-data
Rv0359	-	11	11	2.815	0	0.99582	non-essential
Rv0360c	-	9	7	2.524	1	0.8946	non-essential
Rv0361	-	8	5	2.353	2	0.63358	non-essential
Rv0362	mgtE	16	13	3.359	2	0.86574	non-essential
Rv0363c	fba	18	1	3.53	17	7e-05	no-data
Rv0364	-	13	2	3.058	11	0.0033	no-data
Rv0365c	-	19	14	3.609	2	0.90786	non-essential
Rv0366c	-	7	5	2.16	1	0.82622	non-essential
Rv0367c	-	2	2	0.342	0	0.63065	non-essential
Rv0368c	-	18	14	3.53	2	0.89554	non-essential
Rv0369c	-	7	4	2.16	2	0.58459	non-essential
Rv0370c	-	21	7	3.754	8	0.0413	no-data
Rv0371c	-	7	1	2.16	5	0.10518	non-essential
Rv0372c	-	6	2	1.936	3	0.31477	essential
Rv0373c	-	39	17	4.652	9	0.03856	non-essential
Rv0374c	-	6	2	1.936	2	0.52904	growth-defect
Rv0375c	-	8	4	2.353	3	0.39589	non-essential
Rv0376c	-	21	13	3.754	2	0.92831	non-essential
Rv0377	-	10	5	2.677	2	0.71492	non-essential
Rv0378	-	3	1	0.93	2	0.31374	no-data
Rv0379	secE2	4	3	1.348	1	0.63211	non-essential
Rv0380c	-	11	5	2.815	4	0.29382	non-essential
Rv0381c	-	17	14	3.447	1	0.98573	non-essential
Rv0382c	pyrE	13	0	3.058	13	0.00083	non-essential
Rv0383c	-	9	1	2.524	8	0.01791	essential
Rv0384c	clpB	25	0	4.007	25	0	essential
Rv0385	-	20	16	3.683	3	0.71635	non-essential
Rv0386	-	44	33	4.827	3	0.93746	non-essential
Rv0387c	-	15	11	3.265	1	0.97648	non-essential
Rv0388c	PPE9	9	5	2.524	3	0.43278	non-essential
Rv0389	purT	9	7	2.524	1	0.8946	non-essential
Rv0390	-	8	5	2.353	2	0.63358	non-essential
Rv0391	metZ	22	9	3.821	6	0.16083	non-essential
Rv0392c	ndhA	16	10	3.359	2	0.86574	non-essential
Rv0393	-	10	8	2.677	2	0.71492	non-essential
Rv0394c	-	9	6	2.524	2	0.6768	non-essential
Rv0395	-	8	7	2.353	1	0.86466	non-essential
Rv0396	-	6	3	1.936	2	0.52904	non-essential
Rv0397	-	4	2	1.348	2	0.39468	non-essential
Rv0398c	-	6	4	1.936	2	0.52904	no-data
Rv0399c	lpqK	25	13	4.007	7	0.09518	essential
Rv0400c	fadE7	11	6	2.815	3	0.49993	essential
Rv0401	-	3	2	0.93	1	0.52763	non-essential
Rv0402c	mmpL1	56	37	5.177	6	0.36002	non-essential
Rv0403c	mmpS1	7	5	2.16	1	0.82622	non-essential
Rv0404	fadD30	87	22	5.816	27	0	essential
Rv0405	pks6	124	33	6.33	17	0.0005	non-essential
Rv0406c	-	12	11	2.942	1	0.95021	non-essential
Rv0407	fgd1	20	16	3.683	2	0.91873	non-essential
Rv0408	pta	44	21	4.827	7	0.16141	no-data
Rv0409	ackA	16	10	3.359	2	0.86574	non-essential
Rv0410c	pknG	32	1	4.365	31	0	essential
Rv0411c	glnH	9	0	2.524	9	0.00903	essential
Rv0412c	-	23	0	3.886	23	0	essential
Rv0413	mutT3	8	6	2.353	2	0.63358	non-essential
Rv0414c	thiE	9	0	2.524	9	0.00903	no-data
Rv0415	thiO	12	0	2.942	12	0.00153	essential
Rv0416	thiS	4	0	1.348	4	0.11883	essential
Rv0417	thiG	16	1	3.359	15	0.00026	essential
Rv0418	lpqL	28	18	4.171	3	0.82864	non-essential
Rv0419	lpqM	23	16	3.886	3	0.76519	non-essential
Rv0420c	-	7	7	2.16	0	0.96938	non-essential
Rv0421c	-	10	4	2.677	4	0.27113	non-essential
Rv0422c	thiD	14	0	3.165	14	0.00045	essential
Rv0423c	thiC	22	1	3.821	20	1e-05	essential
Rv0424c	-	9	7	2.524	1	0.8946	non-essential
Rv0425c	ctpH	40	27	4.689	3	0.91954	essential
Rv0426c	-	3	3	0.93	0	0.77553	no-data
Rv0427c	xthA	14	8	3.165	2	0.82743	no-data
Rv0428c	-	17	11	3.447	2	0.88157	non-essential
Rv0429c	def	10	1	2.677	9	0.01003	essential
Rv0430	-	3	0	0.93	3	0.17221	essential
Rv0431	-	10	1	2.677	9	0.01003	non-essential
Rv0432	sodC	13	12	3.058	1	0.96122	non-essential
Rv0433	-	24	18	3.947	3	0.77953	non-essential
Rv0434	-	14	11	3.165	1	0.9698	non-essential
Rv0435c	-	24	21	3.947	1	0.99752	non-essential
Rv0436c	pssA	17	5	3.447	8	0.03357	no-data
Rv0437c	psd	8	2	2.353	6	0.06177	non-essential
Rv0438c	moeA2	15	12	3.265	1	0.97648	non-essential
Rv0439c	-	19	14	3.609	2	0.90786	non-essential
Rv0440	groEL	13	0	3.058	13	0.00083	essential
Rv0441c	-	10	8	2.677	1	0.91791	non-essential
Rv0442c	PPE10	25	17	4.007	2	0.95661	non-essential
Rv0443	-	15	11	3.265	3	0.61132	non-essential
Rv0444c	-	9	5	2.524	1	0.8946	non-essential
Rv0445c	sigK	10	8	2.677	1	0.91791	non-essential
Rv0446c	-	17	11	3.447	2	0.88157	non-essential
Rv0447c	ufaA1	27	23	4.118	1	0.99883	non-essential
Rv0448c	-	16	16	3.359	0	0.99965	non-essential
Rv0449c	-	23	19	3.886	2	0.94423	no-data
Rv0450c	mmpL4	84	34	5.765	14	0.0027	essential
Rv0451c	mmpS4	15	4	3.265	6	0.11268	non-essential
Rv0452	-	10	10	2.677	0	0.99313	non-essential
Rv0453	PPE11	23	17	3.886	2	0.94423	non-essential
Rv0454	-	7	7	2.16	0	0.96938	non-essential
Rv0455c	-	11	1	2.815	10	0.00555	non-essential
Rv0456A	-	4	3	1.348	1	0.63211	no-data
Rv0456c	echA2	11	8	2.815	1	0.93607	non-essential
Rv0457c	-	39	20	4.652	7	0.14447	non-essential
Rv0458	-	23	17	3.886	1	0.99682	non-essential
Rv0459	-	6	4	1.936	1	0.77686	non-essential
Rv0460	-	3	2	0.93	1	0.52763	no-data
Rv0461	-	17	15	3.447	1	0.98573	non-essential
Rv0462	lpd	27	0	4.118	27	0	essential
Rv0463	-	4	3	1.348	1	0.63211	non-essential
Rv0464c	-	15	11	3.265	2	0.84779	non-essential
Rv0465c	-	28	22	4.171	1	0.99909	no-data
Rv0466	-	8	5	2.353	2	0.63358	non-essential
Rv0467	icl	19	5	3.609	9	0.01897	no-data
Rv0468	fadB2	13	11	3.058	1	0.96122	non-essential
Rv0469	umaA	25	16	4.007	3	0.79299	non-essential
Rv0470A	-	11	10	2.815	1	0.93607	no-data
Rv0470c	pcaA	12	8	2.942	2	0.7782	non-essential
Rv0471c	-	11	10	2.815	1	0.93607	non-essential
Rv0472c	-	11	5	2.815	4	0.29382	non-essential
Rv0473	-	16	11	3.359	1	0.98168	non-essential
Rv0474	-	8	6	2.353	1	0.86466	non-essential
Rv0475	hbhA	10	7	2.677	2	0.71492	non-essential
Rv0476	-	7	6	2.16	1	0.82622	non-essential
Rv0477	-	6	5	1.936	1	0.77686	non-essential
Rv0478	deoC	3	3	0.93	0	0.77553	non-essential
Rv0479c	-	13	1	3.058	12	0.00166	essential
Rv0480c	-	16	14	3.359	1	0.98168	non-essential
Rv0481c	-	11	8	2.815	2	0.74854	non-essential
Rv0482	murB	14	1	3.165	13	0.0009	non-essential
Rv0483	lprQ	30	26	4.271	1	0.99945	non-essential
Rv0484c	-	9	6	2.524	1	0.8946	non-essential
Rv0485	-	23	18	3.886	2	0.94423	non-essential
Rv0486	-	13	2	3.058	10	0.00656	no-data
Rv0487	-	9	9	2.524	0	0.98869	non-essential
Rv0488	-	9	8	2.524	1	0.8946	no-data
Rv0489	gpmA	12	0	2.942	12	0.00153	no-data
Rv0490	senX3	16	10	3.359	4	0.39711	non-essential
Rv0491	regX3	10	7	2.677	1	0.91791	non-essential
Rv0492A	-	5	4	1.671	1	0.71349	no-data
Rv0492c	-	17	14	3.447	1	0.98573	non-essential
Rv0493c	-	17	13	3.447	2	0.88157	non-essential
Rv0494	-	8	6	2.353	2	0.63358	non-essential
Rv0495c	-	14	10	3.165	2	0.82743	non-essential
Rv0496	-	8	5	2.353	3	0.39589	non-essential
Rv0497	-	15	2	3.265	9	0.01501	non-essential
Rv0498	-	12	10	2.942	1	0.95021	non-essential
Rv0499	-	6	6	1.936	0	0.94961	non-essential
Rv0500	proC	13	0	3.058	13	0.00083	essential
Rv0500A	-	5	4	1.671	1	0.71349	no-data
Rv0500B	-	2	2	0.342	0	0.63065	no-data
Rv0501	galE2	26	17	4.064	2	0.96172	non-essential
Rv0502	-	19	10	3.609	5	0.2604	non-essential
Rv0503c	cmaA2	21	19	3.754	1	0.99475	non-essential
Rv0504c	-	9	2	2.524	7	0.03537	non-essential
Rv0505c	serB1	21	3	3.754	15	0.00034	non-essential
Rv0506	mmpS2	9	8	2.524	1	0.8946	non-essential
Rv0507	mmpL2	82	38	5.73	13	0.00524	non-essential
Rv0508	-	8	5	2.353	1	0.86466	non-essential
Rv0509	hemA	22	0	3.821	22	0	essential
Rv0510	hemC	13	1	3.058	12	0.00166	essential
Rv0511	hemD	19	1	3.609	18	4e-05	essential
Rv0512	hemB	22	1	3.821	21	1e-05	no-data
Rv0513	-	7	5	2.16	2	0.58459	non-essential
Rv0514	-	2	1	0.342	1	0.39346	non-essential
Rv0515	-	2	1	0.342	1	0.39346	non-essential
Rv0516c	-	9	8	2.524	1	0.8946	non-essential
Rv0517	-	21	20	3.754	1	0.99475	non-essential
Rv0518	-	12	10	2.942	1	0.95021	non-essential
Rv0519c	-	10	8	2.677	1	0.91791	non-essential
Rv0520	-	5	5	1.671	0	0.91709	non-essential
Rv0521	-	5	4	1.671	1	0.71349	no-data
Rv0522	gabP	23	18	3.886	2	0.94423	no-data
Rv0523c	-	9	5	2.524	3	0.43278	non-essential
Rv0524	hemL	21	0	3.754	21	1e-05	essential
Rv0525	-	10	1	2.677	9	0.01003	essential
Rv0526	-	7	0	2.16	7	0.02762	essential
Rv0527	ccdA	5	0	1.671	5	0.07631	essential
Rv0528	-	16	0	3.359	16	0.00013	essential
Rv0529	ccsA	18	0	3.53	18	4e-05	essential
Rv0530	-	18	15	3.53	1	0.98889	non-essential
Rv0531	-	4	1	1.348	3	0.22276	non-essential
Rv0532	PE_PGRS6	21	11	3.754	3	0.73366	no-data
Rv0533c	fabH	12	9	2.942	1	0.95021	non-essential
Rv0534c	menA	12	1	2.942	11	0.00304	non-essential
Rv0535	pnp	9	4	2.524	4	0.24771	no-data
Rv0536	galE3	12	10	2.942	1	0.95021	non-essential
Rv0537c	-	20	16	3.683	2	0.91873	non-essential
Rv0538	-	15	11	3.265	1	0.97648	no-data
Rv0539	-	6	2	1.936	3	0.31477	non-essential
Rv0540	-	11	6	2.815	3	0.49993	essential
Rv0541c	-	19	1	3.609	18	4e-05	essential
Rv0542c	menE	15	1	3.265	14	0.00048	essential
Rv0543c	-	3	0	0.93	3	0.17221	non-essential
Rv0544c	-	7	6	2.16	1	0.82622	no-data
Rv0545c	pitA	14	9	3.165	2	0.82743	no-data
Rv0546c	-	8	6	2.353	2	0.63358	non-essential
Rv0547c	-	10	7	2.677	1	0.91791	non-essential
Rv0548c	menB	13	2	3.058	11	0.0033	non-essential
Rv0549c	-	4	3	1.348	1	0.63211	non-essential
Rv0550c	-	3	1	0.93	2	0.31374	non-essential
Rv0551c	fadD8	33	26	4.41	2	0.9841	non-essential
Rv0552	-	19	12	3.609	3	0.6979	growth-defect
Rv0553	menC	12	1	2.942	11	0.00304	essential
Rv0554	bpoC	14	12	3.165	2	0.82743	growth-defect
Rv0555	menD	15	0	3.265	15	0.00024	essential
Rv0556	-	13	0	3.058	13	0.00083	essential
Rv0557	pimB	15	6	3.265	5	0.21191	essential
Rv0558	ubiE	14	0	3.165	14	0.00045	essential
Rv0559c	-	7	6	2.16	1	0.82622	non-essential
Rv0560c	-	15	8	3.265	4	0.37774	non-essential
Rv0561c	-	18	14	3.53	2	0.89554	no-data
Rv0562	grcC1	15	1	3.265	14	0.00048	essential
Rv0563	htpX	11	1	2.815	10	0.00555	non-essential
Rv0564c	gpsA	12	9	2.942	1	0.95021	non-essential
Rv0565c	-	36	26	4.536	2	0.98909	non-essential
Rv0566c	-	6	4	1.936	1	0.77686	non-essential
Rv0567	-	20	17	3.683	2	0.91873	non-essential
Rv0568	cyp135B1	12	8	2.942	1	0.95021	non-essential
Rv0569	-	4	4	1.348	0	0.86358	non-essential
Rv0570	nrdZ	37	26	4.576	4	0.68968	non-essential
Rv0571c	-	14	11	3.165	1	0.9698	no-data
Rv0572c	-	8	8	2.353	0	0.98139	non-essential
Rv0573c	-	17	12	3.447	2	0.88157	non-essential
Rv0574c	-	21	16	3.754	2	0.92831	non-essential
Rv0575c	-	14	10	3.165	1	0.9698	non-essential
Rv0576	-	20	11	3.683	2	0.91873	non-essential
Rv0577	TB27.3	14	10	3.165	2	0.82743	non-essential
Rv0578c	PE_PGRS7	28	13	4.171	5	0.35888	non-essential
Rv0579	-	15	11	3.265	2	0.84779	non-essential
Rv0580c	-	10	7	2.677	2	0.71492	non-essential
Rv0581	-	4	4	1.348	0	0.86358	non-essential
Rv0582	-	10	4	2.677	4	0.27113	non-essential
Rv0583c	lpqN	8	8	2.353	0	0.98139	non-essential
Rv0584	-	62	42	5.325	6	0.3899	non-essential
Rv0585c	-	42	20	4.76	7	0.15468	non-essential
Rv0586	-	12	6	2.942	3	0.53046	non-essential
Rv0587	yrbE2A	13	6	3.058	3	0.55913	non-essential
Rv0588	yrbE2B	16	7	3.359	5	0.22432	essential
Rv0589	mce2A	27	15	4.118	4	0.57425	non-essential
Rv0590	mce2B	11	10	2.815	1	0.93607	no-data
Rv0590A	-	6	2	1.936	3	0.31477	no-data
Rv0591	mce2C	22	16	3.821	3	0.74993	non-essential
Rv0592	mce2D	29	18	4.222	3	0.8391	non-essential
Rv0593	lprL	19	13	3.609	3	0.6979	non-essential
Rv0594	mce2F	30	26	4.271	1	0.99945	non-essential
Rv0595c	-	8	8	2.353	0	0.98139	non-essential
Rv0596c	-	5	0	1.671	5	0.07631	no-data
Rv0597c	-	14	9	3.165	3	0.58605	non-essential
Rv0598c	-	7	5	2.16	2	0.58459	non-essential
Rv0599c	-	6	3	1.936	2	0.52904	non-essential
Rv0600c	-	4	3	1.348	1	0.63211	non-essential
Rv0601c	-	4	2	1.348	2	0.39468	no-data
Rv0602c	tcrA	11	7	2.815	2	0.74854	non-essential
Rv0603	-	2	2	0.342	0	0.63065	non-essential
Rv0604	lpqO	7	6	2.16	1	0.82622	non-essential
Rv0605	-	10	10	2.677	0	0.99313	non-essential
Rv0606	-	9	5	2.524	2	0.6768	non-essential
Rv0607	-	1	1	-0.664	0	0.39226	essential
Rv0608	-	2	1	0.342	1	0.39346	no-data
Rv0609	-	7	4	2.16	3	0.35661	non-essential
Rv0609A	-	2	1	0.342	1	0.39346	no-data
Rv0610c	-	11	10	2.815	1	0.93607	non-essential
Rv0611c	-	13	10	3.058	1	0.96122	non-essential
Rv0612	-	6	6	1.936	0	0.94961	non-essential
Rv0613c	-	17	15	3.447	1	0.98573	non-essential
Rv0614	-	14	12	3.165	1	0.9698	non-essential
Rv0615	-	5	4	1.671	1	0.71349	non-essential
Rv0616c	-	6	3	1.936	1	0.77686	no-data
Rv0617	-	3	2	0.93	1	0.52763	non-essential
Rv0618	galTa	9	7	2.524	1	0.8946	no-data
Rv0619	galTb	9	5	2.524	3	0.43278	non-essential
Rv0620	galK	9	3	2.524	4	0.24771	non-essential
Rv0621	-	9	5	2.524	3	0.43278	non-essential
Rv0622	-	13	5	3.058	4	0.3371	no-data
Rv0623	-	3	1	0.93	2	0.31374	non-essential
Rv0624	-	7	6	2.16	1	0.82622	non-essential
Rv0625c	-	10	8	2.677	1	0.91791	non-essential
Rv0626	-	4	3	1.348	1	0.63211	no-data
Rv0627	-	1	0	-0.664	1	0.2212	essential
Rv0628c	-	4	3	1.348	1	0.63211	essential
Rv0629c	recD	16	11	3.359	2	0.86574	non-essential
Rv0630c	recB	34	20	4.453	6	0.23737	no-data
Rv0631c	recC	19	12	3.609	3	0.6979	no-data
Rv0632c	echA3	14	5	3.165	4	0.35774	non-essential
Rv0633c	-	14	11	3.165	2	0.82743	no-data
Rv0634A	-	6	3	1.936	3	0.31477	no-data
Rv0634B	rpmG	4	0	1.348	4	0.11883	no-data
Rv0634c	-	13	11	3.058	1	0.96122	non-essential
Rv0635	-	14	0	3.165	14	0.00045	essential
Rv0636	-	8	0	2.353	8	0.01594	essential
Rv0637	-	8	1	2.353	7	0.0315	non-essential
Rv0638	secE	9	0	2.524	9	0.00903	essential
Rv0639	nusG	13	0	3.058	13	0.00083	no-data
Rv0640	rplK	6	0	1.936	6	0.04669	essential
Rv0641	rplA	8	1	2.353	7	0.0315	non-essential
Rv0642c	mmaA4	19	5	3.609	9	0.01897	non-essential
Rv0643c	mmaA3	22	18	3.821	2	0.93677	non-essential
Rv0644c	mmaA2	12	9	2.942	1	0.95021	non-essential
Rv0645c	mmaA1	20	19	3.683	1	0.99326	non-essential
Rv0646c	lipG	10	9	2.677	1	0.91791	non-essential
Rv0647c	-	15	2	3.265	13	0.00096	non-essential
Rv0648	-	38	30	4.614	2	0.99151	non-essential
Rv0649	fabD2	4	2	1.348	2	0.39468	non-essential
Rv0650	-	6	5	1.936	1	0.77686	non-essential
Rv0651	rplJ	6	0	1.936	6	0.04669	essential
Rv0652	rplL	1	1	-0.664	0	0.39226	essential
Rv0653c	-	10	6	2.677	2	0.71492	non-essential
Rv0654	-	27	22	4.118	2	0.96624	non-essential
Rv0655	mkl	15	9	3.265	2	0.84779	non-essential
Rv0656c	-	5	4	1.671	1	0.71349	non-essential
Rv0657c	-	2	1	0.342	1	0.39346	non-essential
Rv0658c	-	17	10	3.447	1	0.98573	non-essential
Rv0659c	-	4	3	1.348	1	0.63211	non-essential
Rv0660c	-	2	1	0.342	1	0.39346	non-essential
Rv0661c	-	5	5	1.671	0	0.91709	non-essential
Rv0662c	-	6	6	1.936	0	0.94961	non-essential
Rv0663	atsD	47	26	4.923	10	0.02351	non-essential
Rv0664	-	3	2	0.93	1	0.52763	non-essential
Rv0665	-	5	3	1.671	2	0.46607	non-essential
Rv0666	-	n/a	n/a	n/a	n/a	n/a	n/a
Rv0667	rpoB	39	0	4.652	39	0	essential
Rv0668	rpoC	52	4	5.069	46	0	essential
Rv0669c	-	37	32	4.576	2	0.99038	non-essential
Rv0670	end	5	4	1.671	1	0.71349	non-essential
Rv0671	lpqP	13	11	3.058	1	0.96122	non-essential
Rv0672	fadE8	27	16	4.118	5	0.34862	non-essential
Rv0673	echA4	10	6	2.677	3	0.46741	non-essential
Rv0674	-	7	2	2.16	4	0.19859	essential
Rv0675	echA5	5	2	1.671	3	0.27021	essential
Rv0676c	mmpL5	32	22	4.365	2	0.98197	non-essential
Rv0677c	mmpS5	6	4	1.936	1	0.77686	non-essential
Rv0678	-	5	4	1.671	1	0.71349	no-data
Rv0679c	-	6	4	1.936	1	0.77686	non-essential
Rv0680c	-	3	3	0.93	0	0.77553	non-essential
Rv0681	-	13	9	3.058	2	0.80436	non-essential
Rv0682	rpsL	8	0	2.353	8	0.01594	essential
Rv0683	rpsG	5	0	1.671	5	0.07631	essential
Rv0684	fusA1	34	0	4.453	34	0	essential
Rv0685	tuf	12	1	2.942	11	0.00304	essential
Rv0686	-	12	12	2.942	0	0.99746	non-essential
Rv0687	fabG	17	7	3.447	5	0.23654	no-data
Rv0688	-	19	12	3.609	2	0.90786	non-essential
Rv0689c	-	4	3	1.348	1	0.63211	non-essential
Rv0690c	-	17	13	3.447	2	0.88157	no-data
Rv0691c	-	9	6	2.524	1	0.8946	non-essential
Rv0692	-	7	5	2.16	1	0.82622	non-essential
Rv0693	pqqE	19	10	3.609	3	0.6979	non-essential
Rv0694	lldD1	18	8	3.53	3	0.67826	no-data
Rv0695	-	12	7	2.942	3	0.53046	no-data
Rv0696	-	27	12	4.118	7	0.10239	non-essential
Rv0697	-	27	5	4.118	12	0.00344	essential
Rv0698	-	12	3	2.942	6	0.09121	non-essential
Rv0699	-	3	2	0.93	1	0.52763	no-data
Rv0700	rpsJ	7	1	2.16	6	0.05426	essential
Rv0701	rplC	16	0	3.359	16	0.00013	essential
Rv0702	rplD	11	0	2.815	11	0.00279	essential
Rv0703	rplW	5	0	1.671	5	0.07631	essential
Rv0704	rplB	18	0	3.53	18	4e-05	essential
Rv0705	rpsS	2	0	0.342	2	0.22197	essential
Rv0706	rplV	9	0	2.524	9	0.00903	essential
Rv0707	rpsC	14	0	3.165	14	0.00045	essential
Rv0708	rplP	10	0	2.677	10	0.00505	essential
Rv0709	rpmC	4	0	1.348	4	0.11883	essential
Rv0710	rpsQ	12	2	2.942	10	0.00606	essential
Rv0711	atsA	46	32	4.892	3	0.94487	non-essential
Rv0712	-	20	8	3.683	5	0.27205	non-essential
Rv0713	-	20	13	3.683	3	0.71635	non-essential
Rv0714	rplN	5	0	1.671	5	0.07631	essential
Rv0715	rplX	5	0	1.671	5	0.07631	essential
Rv0716	rplE	4	0	1.348	4	0.11883	essential
Rv0717	rpsN	3	0	0.93	3	0.17221	no-data
Rv0718	rpsH	10	0	2.677	10	0.00505	essential
Rv0719	rplF	16	0	3.359	16	0.00013	essential
Rv0720	rplR	4	0	1.348	4	0.11883	essential
Rv0721	rpsE	13	1	3.058	10	0.00656	essential
Rv0722	rpmD	2	1	0.342	1	0.39346	essential
Rv0723	rplO	3	1	0.93	2	0.31374	non-essential
Rv0724	sppA	31	21	4.319	2	0.97956	non-essential
Rv0724A	-	5	4	1.671	1	0.71349	no-data
Rv0725c	-	10	6	2.677	3	0.46741	non-essential
Rv0726c	-	16	8	3.359	3	0.63505	non-essential
Rv0727c	fucA	13	10	3.058	1	0.96122	non-essential
Rv0728c	serA2	9	5	2.524	2	0.6768	non-essential
Rv0729	xylB	19	12	3.609	2	0.90786	non-essential
Rv0730	-	4	2	1.348	2	0.39468	no-data
Rv0731c	-	10	8	2.677	1	0.91791	non-essential
Rv0732	secY	28	1	4.171	27	0	essential
Rv0733	adk	6	1	1.936	5	0.09086	no-data
Rv0734	mapA	10	5	2.677	2	0.71492	no-data
Rv0735	sigL	7	7	2.16	0	0.96938	non-essential
Rv0736	-	9	1	2.524	8	0.01791	essential
Rv0737	-	5	3	1.671	2	0.46607	no-data
Rv0738	-	1	1	-0.664	0	0.39226	no-data
Rv0739	-	18	15	3.53	2	0.89554	non-essential
Rv0740	-	7	3	2.16	2	0.58459	non-essential
Rv0741	-	4	3	1.348	1	0.63211	non-essential
Rv0742	PE_PGRS8	6	4	1.936	2	0.52904	non-essential
Rv0743c	-	10	9	2.677	1	0.91791	non-essential
Rv0744c	-	9	3	2.524	4	0.24771	essential
Rv0745	-	7	6	2.16	1	0.82622	non-essential
Rv0746	PE_PGRS9	16	8	3.359	3	0.63505	no-data
Rv0747	PE_PGRS10	17	12	3.447	2	0.88157	non-essential
Rv0748	-	3	3	0.93	0	0.77553	non-essential
Rv0749	-	4	3	1.348	1	0.63211	non-essential
Rv0749A	-	2	2	0.342	0	0.63065	no-data
Rv0750	-	2	1	0.342	1	0.39346	non-essential
Rv0751c	mmsB	8	6	2.353	1	0.86466	non-essential
Rv0752c	fadE9	16	8	3.359	2	0.86574	non-essential
Rv0753c	mmsA	19	15	3.609	1	0.99135	non-essential
Rv0754	PE_PGRS11	31	21	4.319	6	0.21891	non-essential
Rv0755A	-	7	6	2.16	1	0.82622	no-data
Rv0755c	PPE12	55	13	5.151	19	6e-05	essential
Rv0756c	-	7	7	2.16	0	0.96938	non-essential
Rv0757	phoP	12	1	2.942	9	0.01203	growth-defect
Rv0758	phoR	18	8	3.53	3	0.67826	non-essential
Rv0759c	-	2	0	0.342	2	0.22197	non-essential
Rv0760c	-	6	4	1.936	1	0.77686	non-essential
Rv0761c	adhB	14	8	3.165	3	0.58605	non-essential
Rv0762c	-	14	11	3.165	1	0.9698	non-essential
Rv0763c	-	3	1	0.93	2	0.31374	no-data
Rv0764c	cyp51	19	10	3.609	4	0.45168	non-essential
Rv0765c	-	12	7	2.942	1	0.95021	no-data
Rv0766c	cyp123	26	14	4.064	5	0.33819	no-data
Rv0767c	-	14	9	3.165	2	0.82743	non-essential
Rv0768	aldA	28	15	4.171	4	0.5875	non-essential
Rv0769	-	17	11	3.447	3	0.65733	non-essential
Rv0770	-	10	8	2.677	1	0.91791	non-essential
Rv0771	-	11	6	2.815	2	0.74854	non-essential
Rv0772	purD	25	0	4.007	25	0	essential
Rv0773c	ggtA	20	11	3.683	4	0.46875	non-essential
Rv0774c	-	11	6	2.815	2	0.74854	non-essential
Rv0775	-	9	9	2.524	0	0.98869	non-essential
Rv0776c	-	15	13	3.265	2	0.84779	non-essential
Rv0777	purB	19	1	3.609	18	4e-05	no-data
Rv0778	cyp126	22	14	3.821	2	0.93677	no-data
Rv0779c	-	7	3	2.16	4	0.19859	non-essential
Rv0780	hemH	26	0	4.064	26	0	essential
Rv0781	ptrBa	26	6	4.064	8	0.05088	essential
Rv0782	ptrBb	37	11	4.576	8	0.07162	non-essential
Rv0783c	emrB	26	10	4.064	6	0.18716	non-essential
Rv0784	-	10	4	2.677	2	0.71492	non-essential
Rv0785	-	36	21	4.536	3	0.89648	non-essential
Rv0786c	-	12	6	2.942	3	0.53046	non-essential
Rv0787	-	16	13	3.359	2	0.86574	non-essential
Rv0787A	-	2	0	0.342	2	0.22197	no-data
Rv0788	purQ	12	0	2.942	12	0.00153	essential
Rv0789c	-	7	6	2.16	1	0.82622	non-essential
Rv0790c	-	21	11	3.754	5	0.28352	non-essential
Rv0791c	-	13	9	3.058	1	0.96122	non-essential
Rv0792c	-	18	11	3.53	3	0.67826	non-essential
Rv0793	-	9	6	2.524	2	0.6768	non-essential
Rv0794c	-	20	10	3.683	4	0.46875	non-essential
Rv0795	-	n/a	n/a	n/a	n/a	n/a	n/a
Rv0796	-	1	0	-0.664	1	0.2212	no-data
Rv0797	-	2	2	0.342	0	0.63065	non-essential
Rv0798c	cfp29	16	5	3.359	6	0.11972	essential
Rv0799c	-	10	3	2.677	3	0.46741	non-essential
Rv0800	pepC	17	14	3.447	1	0.98573	non-essential
Rv0801	-	2	1	0.342	1	0.39346	non-essential
Rv0802c	-	15	7	3.265	5	0.21191	non-essential
Rv0803	purL	35	0	4.495	35	0	essential
Rv0804	-	7	5	2.16	1	0.82622	non-essential
Rv0805	-	18	11	3.53	3	0.67826	no-data
Rv0806c	cpsY	42	30	4.76	2	0.99486	non-essential
Rv0807	-	2	1	0.342	1	0.39346	non-essential
Rv0808	purF	27	2	4.118	25	0	essential
Rv0809	purM	15	1	3.265	14	0.00048	non-essential
Rv0810c	-	5	1	1.671	4	0.14626	non-essential
Rv0811c	-	17	0	3.447	17	7e-05	essential
Rv0812	-	17	1	3.447	16	0.00014	no-data
Rv0813c	-	14	13	3.165	1	0.9698	non-essential
Rv0814c	sseC2	n/a	n/a	n/a	n/a	n/a	non-essential
Rv0815c	cysA2	4	3	1.348	1	0.63211	no-data
Rv0816c	thiX	3	3	0.93	0	0.77553	non-essential
Rv0817c	-	15	0	3.265	15	0.00024	essential
Rv0818	-	11	8	2.815	2	0.74854	non-essential
Rv0819	-	14	1	3.165	13	0.0009	non-essential
Rv0820	phoT	13	11	3.058	1	0.96122	non-essential
Rv0821c	phoY2	7	3	2.16	3	0.35661	non-essential
Rv0822c	-	30	24	4.271	2	0.97683	non-essential
Rv0823c	-	17	11	3.447	3	0.65733	non-essential
Rv0824c	desA1	20	0	3.683	20	1e-05	essential
Rv0825c	-	10	7	2.677	1	0.91791	non-essential
Rv0826	-	22	19	3.821	1	0.99591	non-essential
Rv0827c	-	7	5	2.16	1	0.82622	non-essential
Rv0828c	-	10	10	2.677	0	0.99313	non-essential
Rv0829	-	2	2	0.342	0	0.63065	non-essential
Rv0830	-	21	18	3.754	2	0.92831	non-essential
Rv0831c	-	19	15	3.609	1	0.99135	non-essential
Rv0832	PE_PGRS12	4	2	1.348	2	0.39468	non-essential
Rv0833	PE_PGRS13	12	3	2.942	4	0.3158	no-data
Rv0834c	PE_PGRS14	28	19	4.171	3	0.82864	no-data
Rv0835	lpqQ	15	12	3.265	2	0.84779	non-essential
Rv0836c	-	10	9	2.677	1	0.91791	non-essential
Rv0837c	-	23	19	3.886	1	0.99682	non-essential
Rv0838	lpqR	7	5	2.16	2	0.58459	non-essential
Rv0839	-	15	13	3.265	1	0.97648	non-essential
Rv0840c	pip	9	7	2.524	1	0.8946	non-essential
Rv0841	-	3	2	0.93	1	0.52763	no-data
Rv0842	-	24	15	3.947	5	0.31684	non-essential
Rv0843	-	17	12	3.447	1	0.98573	non-essential
Rv0844c	narL	10	9	2.677	1	0.91791	non-essential
Rv0845	-	27	18	4.118	5	0.34862	no-data
Rv0846c	-	31	16	4.319	4	0.62484	no-data
Rv0847	lpqS	6	4	1.936	1	0.77686	non-essential
Rv0848	cysK2	29	16	4.222	2	0.97373	no-data
Rv0849	-	23	18	3.886	1	0.99682	non-essential
Rv0850	-	10	8	2.677	2	0.71492	non-essential
Rv0851c	-	9	8	2.524	1	0.8946	no-data
Rv0852	fadD16	15	7	3.265	3	0.61132	no-data
Rv0853c	pdc	26	15	4.064	3	0.80563	non-essential
Rv0854	-	7	6	2.16	1	0.82622	non-essential
Rv0855	far	14	9	3.165	2	0.82743	non-essential
Rv0856	-	5	3	1.671	1	0.71349	non-essential
Rv0857	-	9	6	2.524	2	0.6768	non-essential
Rv0858c	-	21	14	3.754	2	0.92831	non-essential
Rv0859	fadA	9	4	2.524	2	0.6768	non-essential
Rv0860	fadB	27	4	4.118	8	0.05278	non-essential
Rv0861c	ercc3	27	15	4.118	5	0.34862	non-essential
Rv0862c	-	30	12	4.271	5	0.37892	growth-defect
Rv0863	-	7	5	2.16	1	0.82622	non-essential
Rv0864	moaC	11	10	2.815	1	0.93607	non-essential
Rv0865	mog	8	5	2.353	2	0.63358	non-essential
Rv0866	moaE2	4	4	1.348	0	0.86358	non-essential
Rv0867c	rpfA	11	8	2.815	2	0.74854	non-essential
Rv0868c	moaD2	7	5	2.16	1	0.82622	non-essential
Rv0869c	moaA	15	11	3.265	1	0.97648	non-essential
Rv0870c	-	5	5	1.671	0	0.91709	non-essential
Rv0871	cspB	5	4	1.671	1	0.71349	non-essential
Rv0872c	PE_PGRS15	28	20	4.171	3	0.82864	non-essential
Rv0873	fadE10	35	26	4.495	2	0.98763	non-essential
Rv0874c	-	10	7	2.677	2	0.71492	non-essential
Rv0875c	-	12	2	2.942	10	0.00606	essential
Rv0876c	-	26	12	4.064	6	0.18716	no-data
Rv0877	-	16	13	3.359	1	0.98168	non-essential
Rv0878c	PPE13	19	18	3.609	1	0.99135	non-essential
Rv0879c	-	4	3	1.348	1	0.63211	non-essential
Rv0880	-	1	0	-0.664	1	0.2212	non-essential
Rv0881	-	15	11	3.265	1	0.97648	non-essential
Rv0882	-	2	1	0.342	1	0.39346	non-essential
Rv0883c	-	6	0	1.936	6	0.04669	essential
Rv0884c	serC	13	1	3.058	12	0.00166	essential
Rv0885	-	15	8	3.265	3	0.61132	non-essential
Rv0886	fprB	26	18	4.064	5	0.33819	non-essential
Rv0887c	-	4	3	1.348	1	0.63211	non-essential
Rv0888	-	31	21	4.319	7	0.11664	non-essential
Rv0889c	citA	12	9	2.942	2	0.7782	non-essential
Rv0890c	-	48	38	4.953	2	0.99758	non-essential
Rv0891c	-	25	19	4.007	2	0.95661	non-essential
Rv0892	-	43	14	4.794	5	0.49474	no-data
Rv0893c	-	23	4	3.886	15	0.00037	no-data
Rv0894	-	18	11	3.53	3	0.67826	essential
Rv0895	-	29	22	4.222	1	0.99929	non-essential
Rv0896	gltA	29	0	4.222	29	0	no-data
Rv0897c	-	20	11	3.683	4	0.46875	no-data
Rv0898c	-	2	2	0.342	0	0.63065	non-essential
Rv0899	ompA	20	8	3.683	6	0.14734	no-data
Rv0900	-	2	2	0.342	0	0.63065	essential
Rv0901	-	9	5	2.524	3	0.43278	non-essential
Rv0902c	prrB	15	2	3.265	13	0.00096	non-essential
Rv0903c	prrA	10	1	2.677	9	0.01003	no-data
Rv0904c	accD3	25	18	4.007	2	0.95661	non-essential
Rv0905	echA6	10	6	2.677	2	0.71492	non-essential
Rv0906	-	16	10	3.359	4	0.39711	non-essential
Rv0907	-	40	14	4.689	9	0.03953	no-data
Rv0908	ctpE	31	21	4.319	2	0.97956	non-essential
Rv0909	-	3	2	0.93	1	0.52763	no-data
Rv0910	-	7	5	2.16	2	0.58459	non-essential
Rv0911	-	16	10	3.359	2	0.86574	non-essential
Rv0912	-	5	3	1.671	1	0.71349	non-essential
Rv0913c	-	41	13	4.725	11	0.01036	no-data
Rv0914c	-	16	13	3.359	2	0.86574	non-essential
Rv0915c	PPE14	20	13	3.683	2	0.91873	non-essential
Rv0916c	PE7	6	2	1.936	2	0.52904	no-data
Rv0917	betP	42	23	4.76	3	0.92907	non-essential
Rv0918	-	8	7	2.353	1	0.86466	no-data
Rv0919	-	10	7	2.677	1	0.91791	non-essential
Rv0920c	-	22	16	3.821	1	0.99591	no-data
Rv0921	-	7	5	2.16	1	0.82622	non-essential
Rv0922	-	18	15	3.53	1	0.98889	non-essential
Rv0923c	-	22	14	3.821	4	0.50131	non-essential
Rv0924c	mntH	20	15	3.683	2	0.91873	non-essential
Rv0925c	-	17	11	3.447	2	0.88157	non-essential
Rv0926c	-	21	14	3.754	2	0.92831	non-essential
Rv0927c	-	6	5	1.936	1	0.77686	no-data
Rv0928	pstS3	22	14	3.821	5	0.2948	non-essential
Rv0929	pstC2	17	6	3.447	3	0.65733	non-essential
Rv0930	pstA1	17	11	3.447	4	0.41588	non-essential
Rv0931c	pknD	45	38	4.86	1	0.99999	non-essential
Rv0932c	pstS2	25	19	4.007	3	0.79299	non-essential
Rv0933	pstB	12	7	2.942	4	0.3158	non-essential
Rv0934	pstS1	22	19	3.821	1	0.99591	non-essential
Rv0935	pstC1	12	11	2.942	1	0.95021	non-essential
Rv0936	pstA2	20	16	3.683	2	0.91873	non-essential
Rv0937c	-	12	5	2.942	4	0.3158	no-data
Rv0938	-	43	10	4.794	14	0.00138	no-data
Rv0939	-	32	14	4.365	4	0.63652	no-data
Rv0940c	-	16	7	3.359	5	0.22432	no-data
Rv0941c	-	9	8	2.524	1	0.8946	non-essential
Rv0942	-	8	7	2.353	1	0.86466	non-essential
Rv0943c	-	17	15	3.447	1	0.98573	non-essential
Rv0944	-	9	6	2.524	2	0.6768	non-essential
Rv0945	-	8	3	2.353	3	0.39589	no-data
Rv0946c	pgi	20	1	3.683	19	2e-05	essential
Rv0948c	-	7	2	2.16	5	0.10518	non-essential
Rv0949	uvrD1	45	3	4.86	38	0	essential
Rv0950c	-	21	5	3.754	6	0.15411	non-essential
Rv0951	sucC	16	0	3.359	16	0.00013	essential
Rv0952	sucD	12	0	2.942	12	0.00153	essential
Rv0953c	-	14	13	3.165	1	0.9698	non-essential
Rv0954	-	29	17	4.222	4	0.60035	non-essential
Rv0955	-	19	2	3.609	17	8e-05	essential
Rv0956	purN	15	1	3.265	13	0.00096	non-essential
Rv0957	purH	24	0	3.947	24	0	essential
Rv0958	-	16	10	3.359	3	0.63505	non-essential
Rv0959	-	19	8	3.609	6	0.14052	non-essential
Rv0960	-	7	4	2.16	2	0.58459	non-essential
Rv0961	-	7	3	2.16	3	0.35661	non-essential
Rv0962c	lprP	15	12	3.265	1	0.97648	non-essential
Rv0963c	-	11	8	2.815	1	0.93607	no-data
Rv0964c	-	5	4	1.671	1	0.71349	non-essential
Rv0965c	-	7	6	2.16	1	0.82622	non-essential
Rv0966c	-	10	6	2.677	2	0.71492	non-essential
Rv0967	-	1	1	-0.664	0	0.39226	no-data
Rv0968	-	6	5	1.936	1	0.77686	non-essential
Rv0969	ctpV	21	16	3.754	3	0.73366	non-essential
Rv0970	-	12	4	2.942	3	0.53046	non-essential
Rv0971c	echA7	7	5	2.16	1	0.82622	non-essential
Rv0972c	fadE12	18	5	3.53	6	0.13364	no-data
Rv0973c	accA2	25	4	4.007	10	0.01257	essential
Rv0974c	accD2	20	4	3.683	7	0.0769	no-data
Rv0975c	fadE13	20	11	3.683	2	0.91873	non-essential
Rv0976c	-	20	16	3.683	2	0.91873	non-essential
Rv0977	PE_PGRS16	32	20	4.365	5	0.39833	non-essential
Rv0978c	PE_PGRS17	4	3	1.348	1	0.63211	no-data
Rv0979A	rpmF	2	0	0.342	2	0.22197	no-data
Rv0979c	-	1	0	-0.664	1	0.2212	non-essential
Rv0980c	PE_PGRS18	13	11	3.058	1	0.96122	no-data
Rv0981	mprA	11	9	2.815	2	0.74854	non-essential
Rv0982	mprB	23	2	3.886	21	1e-05	essential
Rv0983	pepD	19	13	3.609	2	0.90786	no-data
Rv0984	moaB2	5	2	1.671	3	0.27021	non-essential
Rv0985c	mscL	10	9	2.677	1	0.91791	non-essential
Rv0986	-	25	6	4.007	16	0.0002	no-data
Rv0987	-	94	23	5.929	22	1e-05	no-data
Rv0988	-	41	5	4.725	15	0.00066	non-essential
Rv0989c	grcC2	19	13	3.609	3	0.6979	non-essential
Rv0990c	-	8	5	2.353	1	0.86466	non-essential
Rv0991c	-	3	3	0.93	0	0.77553	non-essential
Rv0992c	-	6	4	1.936	1	0.77686	non-essential
Rv0993	galU	15	1	3.265	14	0.00048	essential
Rv0994	moeA1	14	8	3.165	2	0.82743	non-essential
Rv0995	rimJ	6	6	1.936	0	0.94961	non-essential
Rv0996	-	18	15	3.53	1	0.98889	non-essential
Rv0997	-	7	5	2.16	2	0.58459	non-essential
Rv0998	-	13	8	3.058	3	0.55913	non-essential
Rv0999	-	11	10	2.815	1	0.93607	non-essential
Rv1000c	-	9	7	2.524	1	0.8946	no-data
Rv1001	arcA	21	15	3.754	2	0.92831	non-essential
Rv1002c	-	24	0	3.947	24	0	essential
Rv1003	-	9	5	2.524	2	0.6768	non-essential
Rv1004c	-	13	8	3.058	3	0.55913	non-essential
Rv1005c	pabB	25	3	4.007	22	0	essential
Rv1006	-	42	26	4.76	3	0.92907	non-essential
Rv1007c	metG	31	0	4.319	31	0	essential
Rv1008	tatD	13	10	3.058	2	0.80436	non-essential
Rv1009	rpfB	12	5	2.942	4	0.3158	growth-defect
Rv1010	ksgA	12	3	2.942	5	0.17347	no-data
Rv1011	ispE	13	0	3.058	13	0.00083	essential
Rv1012	-	6	5	1.936	1	0.77686	non-essential
Rv1013	pks16	22	9	3.821	3	0.74993	no-data
Rv1014c	pth	12	1	2.942	11	0.00304	essential
Rv1015c	rplY	10	0	2.677	10	0.00505	no-data
Rv1016c	lpqT	7	5	2.16	1	0.82622	non-essential
Rv1017c	prsA	13	1	3.058	12	0.00166	essential
Rv1018c	glmU	24	0	3.947	24	0	essential
Rv1019	-	9	9	2.524	0	0.98869	non-essential
Rv1020	mfd	40	31	4.689	3	0.91954	non-essential
Rv1021	-	14	7	3.165	5	0.1993	no-data
Rv1022	lpqU	15	4	3.265	5	0.21191	non-essential
Rv1023	eno	17	0	3.447	17	7e-05	essential
Rv1024	-	8	0	2.353	8	0.01594	essential
Rv1025	-	7	0	2.16	7	0.02762	essential
Rv1026	-	8	3	2.353	5	0.11928	essential
Rv1027c	kdpE	12	3	2.942	5	0.17347	essential
Rv1028A	kdpF	3	2	0.93	1	0.52763	no-data
Rv1028c	kdpD	28	13	4.171	4	0.5875	non-essential
Rv1029	kdpA	28	16	4.171	4	0.5875	non-essential
Rv1030	kdpB	15	11	3.265	2	0.84779	non-essential
Rv1031	kdpC	10	6	2.677	3	0.46741	non-essential
Rv1032c	trcS	25	22	4.007	2	0.95661	non-essential
Rv1033c	trcR	15	13	3.265	1	0.97648	non-essential
Rv1034c	-	3	3	0.93	0	0.77553	no-data
Rv1035c	-	5	1	1.671	3	0.27021	non-essential
Rv1036c	-	5	4	1.671	1	0.71349	non-essential
Rv1037c	esxI	1	1	-0.664	0	0.39226	non-essential
Rv1038c	esxJ	1	1	-0.664	0	0.39226	non-essential
Rv1039c	PPE15	24	18	3.947	4	0.53188	non-essential
Rv1040c	PE8	9	8	2.524	1	0.8946	no-data
Rv1041c	-	2	1	0.342	1	0.39346	non-essential
Rv1042c	-	n/a	n/a	n/a	n/a	n/a	n/a
Rv1043c	-	15	12	3.265	1	0.97648	non-essential
Rv1044	-	13	2	3.058	11	0.0033	no-data
Rv1045	-	12	11	2.942	1	0.95021	non-essential
Rv1046c	-	5	5	1.671	0	0.91709	non-essential
Rv1047	-	2	0	0.342	2	0.22197	non-essential
Rv1048c	-	24	17	3.947	5	0.31684	non-essential
Rv1049	-	4	4	1.348	0	0.86358	non-essential
Rv1050	-	12	9	2.942	1	0.95021	no-data
Rv1051c	-	8	3	2.353	4	0.22354	non-essential
Rv1052	-	7	5	2.16	1	0.82622	non-essential
Rv1053c	-	3	2	0.93	1	0.52763	non-essential
Rv1054	-	5	2	1.671	2	0.46607	no-data
Rv1055	-	3	1	0.93	2	0.31374	non-essential
Rv1056	-	23	16	3.886	2	0.94423	non-essential
Rv1057	-	20	17	3.683	1	0.99326	non-essential
Rv1058	fadD14	30	14	4.271	5	0.37892	non-essential
Rv1059	-	10	2	2.677	8	0.01988	no-data
Rv1060	-	5	3	1.671	1	0.71349	non-essential
Rv1061	-	14	8	3.165	2	0.82743	non-essential
Rv1062	-	6	6	1.936	0	0.94961	no-data
Rv1063c	-	15	9	3.265	4	0.37774	no-data
Rv1064c	lpqV	7	4	2.16	1	0.82622	non-essential
Rv1065	-	10	10	2.677	0	0.99313	non-essential
Rv1066	-	5	4	1.671	1	0.71349	non-essential
Rv1067c	PE_PGRS19	13	8	3.058	4	0.3371	non-essential
Rv1068c	PE_PGRS20	12	6	2.942	5	0.17347	no-data
Rv1069c	-	21	18	3.754	1	0.99475	non-essential
Rv1070c	echA8	8	7	2.353	1	0.86466	non-essential
Rv1071c	echA9	13	11	3.058	1	0.96122	non-essential
Rv1072	-	18	3	3.53	13	0.00115	no-data
Rv1073	-	19	16	3.609	1	0.99135	non-essential
Rv1074c	fadA3	11	9	2.815	1	0.93607	non-essential
Rv1075c	-	19	16	3.609	2	0.90786	non-essential
Rv1076	lipU	22	8	3.821	11	0.00557	non-essential
Rv1077	cbs	28	19	4.171	3	0.82864	non-essential
Rv1078	pra	18	1	3.53	12	0.00229	non-essential
Rv1079	metB	19	7	3.609	5	0.2604	non-essential
Rv1080c	greA	10	1	2.677	9	0.01003	non-essential
Rv1081c	-	7	0	2.16	7	0.02762	non-essential
Rv1082	mca	13	10	3.058	1	0.96122	non-essential
Rv1083	-	4	1	1.348	2	0.39468	no-data
Rv1084	-	26	19	4.064	2	0.96172	non-essential
Rv1085c	-	11	2	2.815	6	0.08394	non-essential
Rv1086	-	15	1	3.265	9	0.01501	non-essential
Rv1087	PE_PGRS21	22	19	3.821	1	0.99591	no-data
Rv1087A	-	8	7	2.353	1	0.86466	no-data
Rv1088	PE9	6	1	1.936	3	0.31477	non-essential
Rv1089	PE10	4	3	1.348	1	0.63211	non-essential
Rv1089A	celA2a	2	2	0.342	0	0.63065	no-data
Rv1090	celA2b	7	7	2.16	0	0.96938	non-essential
Rv1091	PE_PGRS22	27	12	4.118	5	0.34862	no-data
Rv1092c	coaA	20	1	3.683	19	2e-05	essential
Rv1093	glyA	14	0	3.165	14	0.00045	no-data
Rv1094	desA2	13	0	3.058	13	0.00083	essential
Rv1095	phoH2	13	7	3.058	3	0.55913	non-essential
Rv1096	-	20	9	3.683	5	0.27205	growth-defect
Rv1097c	-	17	6	3.447	5	0.23654	non-essential
Rv1098c	fumC	13	0	3.058	13	0.00083	essential
Rv1099c	glpX	14	1	3.165	13	0.0009	non-essential
Rv1100	-	10	6	2.677	2	0.71492	growth-defect
Rv1101c	-	18	13	3.53	3	0.67826	non-essential
Rv1102c	-	9	7	2.524	1	0.8946	non-essential
Rv1103c	-	8	7	2.353	1	0.86466	non-essential
Rv1104	-	11	7	2.815	4	0.29382	non-essential
Rv1105	-	11	7	2.815	1	0.93607	non-essential
Rv1106c	-	18	13	3.53	2	0.89554	non-essential
Rv1107c	xseB	3	3	0.93	0	0.77553	non-essential
Rv1108c	xseA	10	8	2.677	1	0.91791	no-data
Rv1109c	-	9	5	2.524	3	0.43278	non-essential
Rv1110	ispH	14	0	3.165	14	0.00045	no-data
Rv1111c	-	25	10	4.007	12	0.00318	no-data
Rv1112	-	11	5	2.815	4	0.29382	non-essential
Rv1113	-	2	0	0.342	2	0.22197	non-essential
Rv1114	-	3	3	0.93	0	0.77553	non-essential
Rv1115	-	19	8	3.609	6	0.14052	non-essential
Rv1116	-	3	0	0.93	3	0.17221	non-essential
Rv1116A	-	4	2	1.348	2	0.39468	no-data
Rv1117	-	4	3	1.348	1	0.63211	non-essential
Rv1118c	-	12	10	2.942	1	0.95021	non-essential
Rv1119c	-	3	1	0.93	2	0.31374	non-essential
Rv1120c	-	4	1	1.348	2	0.39468	non-essential
Rv1121	zwf1	24	10	3.947	7	0.09156	non-essential
Rv1122	gnd2	15	1	3.265	14	0.00048	essential
Rv1123c	bpoB	8	5	2.353	3	0.39589	non-essential
Rv1124	ephC	12	5	2.942	2	0.7782	non-essential
Rv1125	-	23	16	3.886	3	0.76519	growth-defect
Rv1126c	-	11	1	2.815	7	0.04306	essential
Rv1127c	ppdK	19	4	3.609	7	0.0732	non-essential
Rv1128c	-	29	9	4.222	7	0.10955	essential
Rv1129c	-	27	10	4.118	5	0.34862	no-data
Rv1130	-	27	17	4.118	3	0.8175	non-essential
Rv1131	gltA1	17	6	3.447	3	0.65733	non-essential
Rv1132	-	27	18	4.118	2	0.96624	non-essential
Rv1133c	metE	36	0	4.536	36	0	essential
Rv1134	-	6	5	1.936	1	0.77686	non-essential
Rv1135A	-	6	3	1.936	2	0.52904	no-data
Rv1135c	PPE16	26	18	4.064	2	0.96172	non-essential
Rv1136	-	4	4	1.348	0	0.86358	non-essential
Rv1137c	-	2	2	0.342	0	0.63065	non-essential
Rv1138c	-	16	9	3.359	4	0.39711	non-essential
Rv1139c	-	13	8	3.058	2	0.80436	non-essential
Rv1140	-	11	6	2.815	2	0.74854	non-essential
Rv1141c	echA11	14	10	3.165	1	0.9698	non-essential
Rv1142c	echA10	8	7	2.353	1	0.86466	non-essential
Rv1143	mcr	16	13	3.359	2	0.86574	non-essential
Rv1144	-	12	11	2.942	1	0.95021	non-essential
Rv1145	mmpL13a	11	7	2.815	1	0.93607	non-essential
Rv1146	mmpL13b	23	17	3.886	2	0.94423	non-essential
Rv1147	-	10	5	2.677	3	0.46741	non-essential
Rv1148c	-	13	8	3.058	2	0.80436	non-essential
Rv1149	-	2	1	0.342	1	0.39346	no-data
Rv1151c	-	10	8	2.677	1	0.91791	non-essential
Rv1152	-	5	4	1.671	1	0.71349	non-essential
Rv1153c	omt	19	12	3.609	4	0.45168	non-essential
Rv1154c	-	16	13	3.359	2	0.86574	non-essential
Rv1155	-	11	9	2.815	1	0.93607	non-essential
Rv1156	-	12	9	2.942	2	0.7782	non-essential
Rv1157c	-	9	5	2.524	2	0.6768	no-data
Rv1158c	-	10	4	2.677	4	0.27113	non-essential
Rv1159	pimE	29	6	4.222	11	0.00734	non-essential
Rv1159A	phhB	12	5	2.942	3	0.53046	no-data
Rv1160	mutT2	5	5	1.671	0	0.91709	non-essential
Rv1161	narG	75	45	5.601	6	0.44995	non-essential
Rv1162	narH	35	30	4.495	1	0.99984	non-essential
Rv1163	narJ	15	13	3.265	1	0.97648	non-essential
Rv1164	narI	19	13	3.609	1	0.99135	non-essential
Rv1165	typA	16	13	3.359	2	0.86574	non-essential
Rv1166	lpqW	24	0	3.947	24	0	essential
Rv1167c	-	10	4	2.677	4	0.27113	non-essential
Rv1168c	PPE17	17	13	3.447	2	0.88157	non-essential
Rv1169c	PE11	4	3	1.348	1	0.63211	essential
Rv1170	mshB	12	3	2.942	7	0.04688	non-essential
Rv1171	-	7	5	2.16	1	0.82622	non-essential
Rv1172c	PE12	16	9	3.359	3	0.63505	no-data
Rv1173	fbiC	44	12	4.827	12	0.0056	no-data
Rv1174c	TB8.4	9	9	2.524	0	0.98869	non-essential
Rv1175c	fadH	29	18	4.222	4	0.60035	non-essential
Rv1176c	-	15	10	3.265	2	0.84779	non-essential
Rv1177	fdxC	7	0	2.16	7	0.02762	essential
Rv1178	-	21	15	3.754	3	0.73366	growth-defect
Rv1179c	-	41	33	4.725	2	0.99417	non-essential
Rv1180	pks3	26	11	4.064	4	0.56057	no-data
Rv1181	pks4	70	42	5.501	7	0.24426	non-essential
Rv1182	papA3	40	24	4.689	2	0.99339	essential
Rv1183	mmpL10	53	26	5.097	8	0.10098	no-data
Rv1184c	-	23	16	3.886	2	0.94423	no-data
Rv1185c	fadD21	32	22	4.365	2	0.98197	non-essential
Rv1186c	-	19	9	3.609	3	0.6979	essential
Rv1187	rocA	24	4	3.947	10	0.01207	essential
Rv1188	-	22	7	3.821	7	0.08426	essential
Rv1189	sigI	9	5	2.524	2	0.6768	no-data
Rv1190	-	9	7	2.524	2	0.6768	no-data
Rv1191	-	9	6	2.524	2	0.6768	no-data
Rv1192	-	14	10	3.165	1	0.9698	non-essential
Rv1193	fadD36	21	8	3.754	5	0.28352	essential
Rv1194c	-	19	11	3.609	3	0.6979	essential
Rv1195	PE13	6	6	1.936	0	0.94961	no-data
Rv1196	PPE18	5	2	1.671	3	0.27021	non-essential
Rv1197	esxK	1	1	-0.664	0	0.39226	non-essential
Rv1198	esxL	1	1	-0.664	0	0.39226	non-essential
Rv1199c	-	2	0	0.342	2	0.22197	non-essential
Rv1200	-	30	23	4.271	2	0.97683	non-essential
Rv1201c	-	11	0	2.815	11	0.00279	essential
Rv1202	dapE	17	1	3.447	16	0.00014	essential
Rv1203c	-	8	3	2.353	5	0.11928	non-essential
Rv1204c	-	17	17	3.447	0	0.99979	non-essential
Rv1205	-	13	11	3.058	1	0.96122	non-essential
Rv1206	fadD6	38	26	4.614	5	0.453	non-essential
Rv1207	folP2	10	5	2.677	2	0.71492	non-essential
Rv1208	-	14	0	3.165	14	0.00045	essential
Rv1209	-	5	3	1.671	1	0.71349	non-essential
Rv1210	tagA	11	9	2.815	2	0.74854	non-essential
Rv1211	-	5	2	1.671	3	0.27021	non-essential
Rv1212c	-	32	21	4.365	4	0.63652	non-essential
Rv1213	glgC	31	20	4.319	4	0.62484	non-essential
Rv1214c	PE14	5	4	1.671	1	0.71349	no-data
Rv1215c	-	27	14	4.118	6	0.19361	essential
Rv1216c	-	20	15	3.683	3	0.71635	non-essential
Rv1217c	-	21	11	3.754	3	0.73366	no-data
Rv1218c	-	6	4	1.936	1	0.77686	non-essential
Rv1219c	-	10	8	2.677	2	0.71492	non-essential
Rv1220c	-	11	7	2.815	3	0.49993	non-essential
Rv1221	sigE	17	3	3.447	14	0.00055	non-essential
Rv1222	-	3	1	0.93	1	0.52763	non-essential
Rv1223	htrA	23	3	3.886	20	1e-05	essential
Rv1224	tatB	6	1	1.936	5	0.09086	non-essential
Rv1225c	-	7	6	2.16	1	0.82622	non-essential
Rv1226c	-	15	10	3.265	3	0.61132	non-essential
Rv1227c	-	6	5	1.936	1	0.77686	non-essential
Rv1228	lpqX	9	8	2.524	1	0.8946	non-essential
Rv1229c	mrp	16	1	3.359	15	0.00026	essential
Rv1230c	-	20	15	3.683	2	0.91873	non-essential
Rv1231c	-	7	5	2.16	2	0.58459	non-essential
Rv1232c	-	11	8	2.815	2	0.74854	essential
Rv1233c	-	20	13	3.683	2	0.91873	non-essential
Rv1234	-	9	5	2.524	2	0.6768	non-essential
Rv1235	lpqY	30	17	4.271	4	0.61279	non-essential
Rv1236	sugA	19	10	3.609	3	0.6979	non-essential
Rv1237	sugB	13	5	3.058	4	0.3371	non-essential
Rv1238	sugC	26	7	4.064	11	0.00658	non-essential
Rv1239c	corA	26	15	4.064	2	0.96172	non-essential
Rv1240	mdh	5	0	1.671	5	0.07631	non-essential
Rv1241	-	1	1	-0.664	0	0.39226	no-data
Rv1242	-	10	9	2.677	1	0.91791	non-essential
Rv1243c	PE_PGRS23	19	14	3.609	3	0.6979	non-essential
Rv1244	lpqZ	8	6	2.353	1	0.86466	non-essential
Rv1245c	-	14	11	3.165	2	0.82743	non-essential
Rv1246c	-	8	6	2.353	1	0.86466	non-essential
Rv1247c	-	5	4	1.671	1	0.71349	non-essential
Rv1248c	kgd	46	0	4.892	46	0	essential
Rv1249c	-	13	9	3.058	1	0.96122	non-essential
Rv1250	-	32	24	4.365	2	0.98197	non-essential
Rv1251c	-	58	34	5.228	3	0.97411	non-essential
Rv1252c	lprE	8	7	2.353	1	0.86466	non-essential
Rv1253	deaD	35	18	4.495	7	0.13067	no-data
Rv1254	-	27	1	4.118	25	0	essential
Rv1255c	-	9	5	2.524	3	0.43278	no-data
Rv1256c	cyp130	16	12	3.359	1	0.98168	no-data
Rv1257c	-	16	10	3.359	3	0.63505	no-data
Rv1258c	-	22	16	3.821	3	0.74993	non-essential
Rv1259	-	14	8	3.165	2	0.82743	non-essential
Rv1260	-	28	12	4.171	8	0.05468	no-data
Rv1261c	-	12	7	2.942	2	0.7782	no-data
Rv1262c	-	4	4	1.348	0	0.86358	non-essential
Rv1263	amiB2	22	10	3.821	3	0.74993	non-essential
Rv1264	-	14	10	3.165	2	0.82743	non-essential
Rv1265	-	12	5	2.942	3	0.53046	non-essential
Rv1266c	pknH	29	25	4.222	1	0.99929	non-essential
Rv1267c	embR	21	16	3.754	2	0.92831	non-essential
Rv1268c	-	11	9	2.815	1	0.93607	non-essential
Rv1269c	-	9	7	2.524	1	0.8946	non-essential
Rv1270c	lprA	12	10	2.942	1	0.95021	non-essential
Rv1271c	-	8	4	2.353	2	0.63358	no-data
Rv1272c	-	31	12	4.319	6	0.21891	non-essential
Rv1273c	-	32	11	4.365	6	0.22511	non-essential
Rv1274	lprB	4	1	1.348	3	0.22276	essential
Rv1275	lprC	7	1	2.16	6	0.05426	no-data
Rv1276c	-	8	3	2.353	5	0.11928	non-essential
Rv1277	-	20	15	3.683	3	0.71635	non-essential
Rv1278	-	28	11	4.171	8	0.05468	essential
Rv1279	-	30	19	4.271	5	0.37892	non-essential
Rv1280c	oppA	26	17	4.064	2	0.96172	non-essential
Rv1281c	oppD	28	15	4.171	2	0.97022	no-data
Rv1282c	oppC	16	10	3.359	5	0.22432	no-data
Rv1283c	oppB	21	13	3.754	5	0.28352	non-essential
Rv1284	-	7	4	2.16	1	0.82622	essential
Rv1285	cysD	16	0	3.359	16	0.00013	essential
Rv1286	cysN	35	1	4.495	26	0	essential
Rv1287	-	13	8	3.058	2	0.80436	non-essential
Rv1288	-	32	27	4.365	4	0.63652	non-essential
Rv1289	-	11	8	2.815	1	0.93607	non-essential
Rv1290A	-	7	4	2.16	2	0.58459	no-data
Rv1290c	-	35	29	4.495	1	0.99984	non-essential
Rv1291c	-	4	4	1.348	0	0.86358	non-essential
Rv1292	argS	34	0	4.453	34	0	essential
Rv1293	lysA	27	0	4.118	27	0	essential
Rv1294	thrA	24	0	3.947	24	0	essential
Rv1295	thrC	20	0	3.683	20	1e-05	essential
Rv1296	thrB	16	0	3.359	16	0.00013	essential
Rv1297	rho	22	1	3.821	18	4e-05	essential
Rv1298	rpmE	7	1	2.16	6	0.05426	essential
Rv1299	prfA	14	0	3.165	14	0.00045	essential
Rv1300	hemK	14	0	3.165	14	0.00045	essential
Rv1301	-	11	0	2.815	11	0.00279	essential
Rv1302	rfe	20	4	3.683	16	0.00016	non-essential
Rv1303	-	4	1	1.348	3	0.22276	essential
Rv1304	atpB	11	1	2.815	10	0.00555	no-data
Rv1305	atpE	8	0	2.353	8	0.01594	essential
Rv1306	atpF	4	0	1.348	4	0.11883	essential
Rv1307	atpH	20	0	3.683	20	1e-05	essential
Rv1308	atpA	26	1	4.064	24	0	essential
Rv1309	atpG	19	0	3.609	19	2e-05	essential
Rv1310	atpD	20	0	3.683	20	1e-05	essential
Rv1311	atpC	2	0	0.342	2	0.22197	essential
Rv1312	-	10	1	2.677	5	0.1468	no-data
Rv1313c	-	3	1	0.93	2	0.31374	no-data
Rv1314c	-	16	11	3.359	2	0.86574	non-essential
Rv1315	murA	17	0	3.447	17	7e-05	essential
Rv1316c	ogt	9	6	2.524	3	0.43278	non-essential
Rv1317c	alkA	13	11	3.058	1	0.96122	non-essential
Rv1318c	-	20	17	3.683	1	0.99326	non-essential
Rv1319c	-	29	25	4.222	1	0.99929	non-essential
Rv1320c	-	30	25	4.271	2	0.97683	non-essential
Rv1321	-	12	8	2.942	2	0.7782	non-essential
Rv1322	-	6	5	1.936	1	0.77686	non-essential
Rv1322A	-	7	6	2.16	1	0.82622	no-data
Rv1323	fadA4	15	12	3.265	2	0.84779	non-essential
Rv1324	-	6	1	1.936	5	0.09086	no-data
Rv1325c	PE_PGRS24	11	5	2.815	6	0.08394	non-essential
Rv1326c	glgB	43	1	4.794	42	0	essential
Rv1327c	glgE	39	0	4.652	39	0	essential
Rv1328	glgP	45	24	4.86	4	0.75905	growth-defect
Rv1329c	dinG	25	10	4.007	4	0.54645	non-essential
Rv1330c	-	23	17	3.886	2	0.94423	no-data
Rv1331	clpS	5	4	1.671	1	0.71349	non-essential
Rv1332	-	7	4	2.16	2	0.58459	non-essential
Rv1333	-	13	9	3.058	2	0.80436	non-essential
Rv1334	-	12	12	2.942	0	0.99746	non-essential
Rv1335	-	5	5	1.671	0	0.91709	non-essential
Rv1336	cysM	19	14	3.609	2	0.90786	non-essential
Rv1337	-	13	10	3.058	2	0.80436	non-essential
Rv1338	murI	17	1	3.447	16	0.00014	no-data
Rv1339	-	20	1	3.683	19	2e-05	essential
Rv1340	rph	13	4	3.058	5	0.18649	non-essential
Rv1341	-	6	4	1.936	1	0.77686	non-essential
Rv1342c	-	5	0	1.671	5	0.07631	essential
Rv1343c	lprD	12	1	2.942	11	0.00304	non-essential
Rv1344	-	10	8	2.677	1	0.91791	non-essential
Rv1345	fadD33	23	15	3.886	2	0.94423	growth-defect
Rv1346	fadE14	15	7	3.265	3	0.61132	no-data
Rv1347c	-	13	0	3.058	13	0.00083	essential
Rv1348	-	38	2	4.614	16	0.00031	essential
Rv1349	-	20	0	3.683	20	1e-05	essential
Rv1350	fabG	15	7	3.265	4	0.37774	essential
Rv1351	-	10	6	2.677	1	0.91791	no-data
Rv1352	-	6	5	1.936	1	0.77686	non-essential
Rv1353c	-	13	5	3.058	2	0.80436	non-essential
Rv1354c	-	44	23	4.827	4	0.75131	non-essential
Rv1355c	moeY	41	19	4.725	9	0.04049	no-data
Rv1356c	-	28	12	4.171	3	0.82864	no-data
Rv1357c	-	14	12	3.165	2	0.82743	non-essential
Rv1358	-	74	44	5.581	6	0.44555	no-data
Rv1359	-	17	10	3.447	2	0.88157	non-essential
Rv1360	-	14	13	3.165	1	0.9698	non-essential
Rv1361c	PPE19	10	6	2.677	3	0.46741	non-essential
Rv1362c	-	15	12	3.265	2	0.84779	non-essential
Rv1363c	-	8	7	2.353	1	0.86466	non-essential
Rv1364c	-	33	14	4.41	5	0.4078	non-essential
Rv1365c	rsfA	6	6	1.936	0	0.94961	non-essential
Rv1366	-	19	14	3.609	2	0.90786	non-essential
Rv1367c	-	17	13	3.447	2	0.88157	non-essential
Rv1368	lprF	8	7	2.353	1	0.86466	non-essential
Rv1369c	-	n/a	n/a	n/a	n/a	n/a	n/a
Rv1370c	-	n/a	n/a	n/a	n/a	n/a	n/a
Rv1371	-	30	11	4.271	7	0.1131	no-data
Rv1372	-	18	4	3.53	7	0.06948	non-essential
Rv1373	-	19	18	3.609	1	0.99135	non-essential
Rv1374c	-	14	11	3.165	2	0.82743	non-essential
Rv1375	-	22	18	3.821	1	0.99591	non-essential
Rv1376	-	17	16	3.447	1	0.98573	non-essential
Rv1377c	-	12	12	2.942	0	0.99746	non-essential
Rv1378c	-	25	18	4.007	2	0.95661	non-essential
Rv1379	pyrR	7	1	2.16	6	0.05426	no-data
Rv1380	pyrB	13	0	3.058	13	0.00083	essential
Rv1381	pyrC	11	0	2.815	11	0.00279	essential
Rv1382	-	6	0	1.936	6	0.04669	essential
Rv1383	carA	13	0	3.058	13	0.00083	essential
Rv1384	carB	46	0	4.892	46	0	no-data
Rv1385	pyrF	7	1	2.16	6	0.05426	no-data
Rv1386	PE15	6	6	1.936	0	0.94961	non-essential
Rv1387	PPE20	26	23	4.064	1	0.9985	non-essential
Rv1388	mihF	8	2	2.353	3	0.39589	essential
Rv1389	gmk	6	0	1.936	6	0.04669	essential
Rv1390	rpoZ	8	0	2.353	8	0.01594	essential
Rv1391	dfp	21	0	3.754	21	1e-05	essential
Rv1392	metK	20	1	3.683	19	2e-05	essential
Rv1393c	-	28	20	4.171	2	0.97022	non-essential
Rv1394c	cyp132	19	14	3.609	2	0.90786	non-essential
Rv1395	-	18	9	3.53	3	0.67826	no-data
Rv1396c	PE_PGRS25	13	8	3.058	2	0.80436	non-essential
Rv1397c	-	6	3	1.936	1	0.77686	non-essential
Rv1398c	-	3	3	0.93	0	0.77553	no-data
Rv1399c	lipH	16	13	3.359	1	0.98168	non-essential
Rv1400c	lipI	18	4	3.53	9	0.01798	non-essential
Rv1401	-	9	2	2.524	5	0.13315	no-data
Rv1402	priA	28	1	4.171	27	0	non-essential
Rv1403c	-	16	12	3.359	2	0.86574	non-essential
Rv1404	-	8	2	2.353	6	0.06177	non-essential
Rv1405c	-	12	11	2.942	1	0.95021	non-essential
Rv1406	fmt	9	0	2.524	9	0.00903	essential
Rv1407	fmu	21	13	3.754	3	0.73366	non-essential
Rv1408	rpe	13	1	3.058	12	0.00166	no-data
Rv1409	ribG	14	1	3.165	13	0.0009	essential
Rv1410c	-	30	13	4.271	7	0.1131	non-essential
Rv1411c	lprG	8	5	2.353	2	0.63358	non-essential
Rv1412	ribC	7	1	2.16	6	0.05426	non-essential
Rv1413	-	6	6	1.936	0	0.94961	non-essential
Rv1414	-	4	2	1.348	2	0.39468	non-essential
Rv1415	ribA2	15	0	3.265	15	0.00024	essential
Rv1416	ribH	4	0	1.348	4	0.11883	essential
Rv1417	-	8	1	2.353	5	0.11928	no-data
Rv1418	lprH	15	11	3.265	2	0.84779	non-essential
Rv1419	-	6	5	1.936	1	0.77686	non-essential
Rv1420	uvrC	29	7	4.222	14	0.00093	essential
Rv1421	-	20	6	3.683	4	0.46875	non-essential
Rv1422	-	11	5	2.815	6	0.08394	non-essential
Rv1423	whiA	12	1	2.942	10	0.00606	non-essential
Rv1424c	-	19	10	3.609	5	0.2604	non-essential
Rv1425	-	19	13	3.609	2	0.90786	non-essential
Rv1426c	lipO	29	12	4.222	4	0.60035	non-essential
Rv1427c	fadD12	20	14	3.683	3	0.71635	no-data
Rv1428c	-	19	11	3.609	2	0.90786	non-essential
Rv1429	-	23	15	3.886	3	0.76519	non-essential
Rv1430	PE16	40	26	4.689	3	0.91954	non-essential
Rv1431	-	25	14	4.007	4	0.54645	no-data
Rv1432	-	16	5	3.359	8	0.03162	no-data
Rv1433	-	18	14	3.53	2	0.89554	non-essential
Rv1434	-	1	1	-0.664	0	0.39226	non-essential
Rv1435c	-	15	7	3.265	4	0.37774	non-essential
Rv1436	gap	15	0	3.265	15	0.00024	essential
Rv1437	pgk	16	0	3.359	16	0.00013	essential
Rv1438	tpiA	16	0	3.359	16	0.00013	essential
Rv1439c	-	7	6	2.16	1	0.82622	non-essential
Rv1440	secG	6	1	1.936	4	0.17284	non-essential
Rv1441c	PE_PGRS26	18	9	3.53	2	0.89554	non-essential
Rv1442	bisC	38	29	4.614	2	0.99151	non-essential
Rv1443c	-	3	0	0.93	3	0.17221	non-essential
Rv1444c	-	3	2	0.93	1	0.52763	non-essential
Rv1445c	devB	10	4	2.677	3	0.46741	non-essential
Rv1446c	opcA	15	4	3.265	5	0.21191	essential
Rv1447c	zwf2	20	10	3.683	4	0.46875	non-essential
Rv1448c	tal	13	3	3.058	4	0.3371	essential
Rv1449c	tkt	26	1	4.064	25	0	essential
Rv1450c	PE_PGRS27	29	10	4.222	7	0.10955	no-data
Rv1451	ctaB	16	0	3.359	16	0.00013	non-essential
Rv1452c	PE_PGRS28	13	9	3.058	3	0.55913	no-data
Rv1453	-	12	12	2.942	0	0.99746	non-essential
Rv1454c	qor	17	12	3.447	1	0.98573	non-essential
Rv1455	-	13	11	3.058	1	0.96122	non-essential
Rv1456c	-	14	1	3.165	13	0.0009	essential
Rv1457c	-	8	0	2.353	8	0.01594	essential
Rv1458c	-	14	2	3.165	6	0.10558	no-data
Rv1459c	-	26	5	4.064	11	0.00658	essential
Rv1460	-	9	3	2.524	5	0.13315	non-essential
Rv1461	-	59	0	5.253	59	0	essential
Rv1462	-	14	0	3.165	14	0.00045	essential
Rv1463	-	12	0	2.942	12	0.00153	essential
Rv1464	csd	15	0	3.265	15	0.00024	essential
Rv1465	-	8	1	2.353	7	0.0315	essential
Rv1466	-	1	0	-0.664	1	0.2212	essential
Rv1467c	fadE15	28	17	4.171	3	0.82864	non-essential
Rv1468c	PE_PGRS29	11	6	2.815	3	0.49993	non-essential
Rv1469	ctpD	21	12	3.754	4	0.48529	non-essential
Rv1470	trxA	5	5	1.671	0	0.91709	non-essential
Rv1471	trxB1	3	3	0.93	0	0.77553	non-essential
Rv1472	echA12	16	12	3.359	1	0.98168	non-essential
Rv1473	-	25	14	4.007	3	0.79299	non-essential
Rv1473A	-	4	1	1.348	3	0.22276	no-data
Rv1474c	-	8	4	2.353	1	0.86466	non-essential
Rv1475c	acn	56	1	5.177	55	0	essential
Rv1476	-	7	0	2.16	7	0.02762	essential
Rv1477	-	25	2	4.007	23	0	essential
Rv1478	-	9	7	2.524	1	0.8946	non-essential
Rv1479	moxR1	14	0	3.165	14	0.00045	essential
Rv1480	-	6	1	1.936	5	0.09086	essential
Rv1481	-	14	1	3.165	13	0.0009	non-essential
Rv1482c	-	15	9	3.265	5	0.21191	non-essential
Rv1483	fabG1	13	0	3.058	13	0.00083	non-essential
Rv1484	inhA	10	0	2.677	10	0.00505	non-essential
Rv1485	hemH	25	0	4.007	25	0	essential
Rv1486c	-	8	8	2.353	0	0.98139	non-essential
Rv1487	-	4	2	1.348	2	0.39468	non-essential
Rv1488	-	16	13	3.359	1	0.98168	non-essential
Rv1489	-	7	7	2.16	0	0.96938	no-data
Rv1489A	-	4	4	1.348	0	0.86358	no-data
Rv1490	-	38	11	4.614	9	0.03759	essential
Rv1491c	-	15	11	3.265	2	0.84779	non-essential
Rv1492	mutA	17	12	3.447	3	0.65733	non-essential
Rv1493	mutB	32	19	4.365	6	0.22511	non-essential
Rv1494	-	8	5	2.353	3	0.39589	non-essential
Rv1495	-	6	5	1.936	1	0.77686	non-essential
Rv1496	-	9	7	2.524	1	0.8946	non-essential
Rv1497	lipL	17	13	3.447	3	0.65733	non-essential
Rv1498A	-	3	3	0.93	0	0.77553	no-data
Rv1498c	-	17	14	3.447	2	0.88157	non-essential
Rv1499	-	5	4	1.671	1	0.71349	non-essential
Rv1500	-	36	11	4.536	11	0.00911	non-essential
Rv1501	-	34	10	4.453	9	0.0337	non-essential
Rv1502	-	33	6	4.41	12	0.0042	no-data
Rv1503c	-	18	12	3.53	3	0.67826	non-essential
Rv1504c	-	13	10	3.058	1	0.96122	non-essential
Rv1505c	-	27	5	4.118	18	6e-05	no-data
Rv1506c	-	20	7	3.683	5	0.27205	no-data
Rv1507A	-	15	5	3.265	6	0.11268	no-data
Rv1507c	-	29	4	4.222	18	6e-05	no-data
Rv1508A	-	14	7	3.165	4	0.35774	no-data
Rv1508c	-	44	32	4.827	2	0.996	no-data
Rv1509	-	20	5	3.683	11	0.00507	no-data
Rv1510	-	23	22	3.886	1	0.99682	no-data
Rv1511	gmdA	20	17	3.683	2	0.91873	no-data
Rv1512	epiA	13	0	3.058	13	0.00083	no-data
Rv1513	-	7	2	2.16	4	0.19859	no-data
Rv1514c	-	19	8	3.609	3	0.6979	no-data
Rv1515c	-	18	10	3.53	3	0.67826	no-data
Rv1516c	-	11	6	2.815	1	0.93607	no-data
Rv1517	-	15	6	3.265	5	0.21191	non-essential
Rv1518	-	13	8	3.058	2	0.80436	no-data
Rv1519	-	3	2	0.93	1	0.52763	non-essential
Rv1520	-	26	23	4.064	2	0.96172	non-essential
Rv1521	fadD25	39	21	4.652	5	0.46161	non-essential
Rv1522c	mmpL12	52	28	5.069	13	0.00332	no-data
Rv1523	-	21	16	3.754	2	0.92831	non-essential
Rv1524	-	14	8	3.165	3	0.58605	no-data
Rv1525	wbbL2	23	2	3.886	9	0.02292	no-data
Rv1526c	-	18	7	3.53	5	0.24857	non-essential
Rv1527c	pks5	100	67	6.018	3	0.99816	non-essential
Rv1528c	papA4	7	7	2.16	0	0.96938	non-essential
Rv1529	fadD24	37	18	4.576	6	0.25538	non-essential
Rv1530	adh	25	10	4.007	4	0.54645	no-data
Rv1531	-	8	3	2.353	3	0.39589	non-essential
Rv1532c	-	6	4	1.936	2	0.52904	non-essential
Rv1533	-	11	7	2.815	2	0.74854	non-essential
Rv1534	-	17	13	3.447	2	0.88157	non-essential
Rv1535	-	5	4	1.671	1	0.71349	non-essential
Rv1536	ileS	79	0	5.676	79	0	no-data
Rv1537	dinX	14	10	3.165	2	0.82743	non-essential
Rv1538c	ansA	14	0	3.165	14	0.00045	non-essential
Rv1539	lspA	9	2	2.524	7	0.03537	essential
Rv1540	-	14	0	3.165	14	0.00045	no-data
Rv1541c	lprI	9	8	2.524	1	0.8946	non-essential
Rv1542c	glbN	8	8	2.353	0	0.98139	non-essential
Rv1543	-	15	9	3.265	2	0.84779	non-essential
Rv1544	-	11	8	2.815	1	0.93607	non-essential
Rv1545	-	4	2	1.348	1	0.63211	non-essential
Rv1546	-	6	5	1.936	1	0.77686	non-essential
Rv1547	dnaE	48	1	4.953	47	0	essential
Rv1548c	PPE21	43	12	4.794	6	0.29015	no-data
Rv1549	fadD11.1	9	7	2.524	1	0.8946	no-data
Rv1550	fadD11	23	19	3.886	3	0.76519	non-essential
Rv1551	plsB1	33	17	4.41	6	0.23126	non-essential
Rv1552	frdA	41	21	4.725	6	0.27875	no-data
Rv1553	frdB	14	11	3.165	2	0.82743	non-essential
Rv1554	frdC	10	6	2.677	2	0.71492	non-essential
Rv1555	frdD	5	5	1.671	0	0.91709	non-essential
Rv1556	-	14	10	3.165	2	0.82743	non-essential
Rv1557	mmpL6	21	13	3.754	3	0.73366	non-essential
Rv1558	-	10	8	2.677	1	0.91791	non-essential
Rv1559	ilvA	27	1	4.118	26	0	no-data
Rv1560	-	3	1	0.93	2	0.31374	non-essential
Rv1561	-	9	5	2.524	3	0.43278	non-essential
Rv1562c	treZ	37	14	4.576	8	0.07162	no-data
Rv1563c	treY	35	8	4.495	8	0.06788	no-data
Rv1564c	treX	49	21	4.983	14	0.00157	no-data
Rv1565c	-	46	5	4.892	14	0.00148	no-data
Rv1566c	-	11	6	2.815	2	0.74854	non-essential
Rv1567c	-	10	6	2.677	2	0.71492	non-essential
Rv1568	bioA	16	0	3.359	16	0.00013	non-essential
Rv1569	bioF1	7	1	2.16	3	0.35661	non-essential
Rv1570	bioD	2	0	0.342	2	0.22197	non-essential
Rv1571	-	3	0	0.93	3	0.17221	no-data
Rv1572c	-	1	0	-0.664	1	0.2212	no-data
Rv1573	-	1	0	-0.664	1	0.2212	no-data
Rv1574	-	3	1	0.93	2	0.31374	no-data
Rv1575	-	9	3	2.524	5	0.13315	no-data
Rv1576c	-	8	0	2.353	8	0.01594	no-data
Rv1577c	-	8	2	2.353	5	0.11928	no-data
Rv1578c	-	4	0	1.348	4	0.11883	no-data
Rv1579c	-	4	2	1.348	2	0.39468	no-data
Rv1580c	-	5	4	1.671	1	0.71349	no-data
Rv1581c	-	7	5	2.16	2	0.58459	no-data
Rv1582c	-	33	8	4.41	12	0.0042	no-data
Rv1583c	-	3	3	0.93	0	0.77553	no-data
Rv1584c	-	3	2	0.93	1	0.52763	no-data
Rv1585c	-	10	2	2.677	8	0.01988	no-data
Rv1586c	-	24	15	3.947	6	0.1741	no-data
Rv1587c	-	n/a	n/a	n/a	n/a	n/a	non-essential
Rv1588c	-	4	1	1.348	2	0.39468	non-essential
Rv1589	bioB	11	1	2.815	10	0.00555	non-essential
Rv1590	-	3	0	0.93	3	0.17221	non-essential
Rv1591	-	9	9	2.524	0	0.98869	non-essential
Rv1592c	-	25	20	4.007	2	0.95661	growth-defect
Rv1593c	-	12	6	2.942	2	0.7782	no-data
Rv1594	nadA	10	0	2.677	10	0.00505	essential
Rv1595	nadB	24	0	3.947	24	0	essential
Rv1596	nadC	15	2	3.265	13	0.00096	no-data
Rv1597	-	12	10	2.942	2	0.7782	non-essential
Rv1598c	-	9	6	2.524	1	0.8946	non-essential
Rv1599	hisD	17	0	3.447	17	7e-05	essential
Rv1600	hisC1	26	0	4.064	26	0	essential
Rv1601	hisB	15	0	3.265	15	0.00024	essential
Rv1602	hisH	11	1	2.815	10	0.00555	essential
Rv1603	hisA	10	1	2.677	9	0.01003	essential
Rv1604	impA	13	5	3.058	6	0.09842	no-data
Rv1605	hisF	7	0	2.16	7	0.02762	essential
Rv1606	hisI	9	1	2.524	8	0.01791	essential
Rv1607	chaA	10	8	2.677	2	0.71492	non-essential
Rv1608c	bcpB	8	5	2.353	2	0.63358	non-essential
Rv1609	trpE	26	1	4.064	25	0	essential
Rv1610	-	5	0	1.671	5	0.07631	essential
Rv1611	trpC	12	0	2.942	12	0.00153	essential
Rv1612	trpB	18	0	3.53	18	4e-05	essential
Rv1613	trpA	19	0	3.609	19	2e-05	essential
Rv1614	lgt	27	2	4.118	24	0	essential
Rv1615	-	10	7	2.677	1	0.91791	non-essential
Rv1616	-	11	7	2.815	3	0.49993	non-essential
Rv1617	pykA	14	1	3.165	13	0.0009	essential
Rv1618	tesB1	19	16	3.609	1	0.99135	non-essential
Rv1619	-	23	8	3.886	7	0.08791	non-essential
Rv1620c	cydC	19	2	3.609	13	0.00122	no-data
Rv1621c	cydD	20	1	3.683	13	0.00128	non-essential
Rv1622c	cydB	22	2	3.821	8	0.04322	essential
Rv1623c	cydA	23	5	3.886	9	0.02292	non-essential
Rv1624c	-	5	4	1.671	1	0.71349	non-essential
Rv1625c	cya	31	25	4.319	3	0.85815	non-essential
Rv1626	-	5	5	1.671	0	0.91709	essential
Rv1627c	-	20	12	3.683	7	0.0769	non-essential
Rv1628c	-	7	3	2.16	3	0.35661	non-essential
Rv1629	polA	42	2	4.76	40	0	essential
Rv1630	rpsA	17	0	3.447	17	7e-05	essential
Rv1631	coaE	12	0	2.942	12	0.00153	essential
Rv1632c	-	11	11	2.815	0	0.99582	non-essential
Rv1633	uvrB	38	19	4.614	6	0.26129	non-essential
Rv1634	-	33	30	4.41	1	0.99974	non-essential
Rv1635c	-	32	25	4.365	2	0.98197	non-essential
Rv1636	TB15.3	10	1	2.677	9	0.01003	non-essential
Rv1637c	-	14	13	3.165	1	0.9698	non-essential
Rv1638	uvrA	39	21	4.652	5	0.46161	no-data
Rv1638A	-	5	2	1.671	3	0.27021	no-data
Rv1639c	-	19	10	3.609	3	0.6979	non-essential
Rv1640c	lysS	66	34	5.415	6	0.40904	non-essential
Rv1641	infC	12	2	2.942	10	0.00606	essential
Rv1642	rpmI	1	0	-0.664	1	0.2212	no-data
Rv1643	rplT	8	0	2.353	8	0.01594	no-data
Rv1644	tsnR	11	11	2.815	0	0.99582	non-essential
Rv1645c	-	24	22	3.947	1	0.99752	non-essential
Rv1646	PE17	19	16	3.609	3	0.6979	non-essential
Rv1647	-	12	9	2.942	1	0.95021	non-essential
Rv1648	-	14	13	3.165	1	0.9698	non-essential
Rv1649	pheS	13	0	3.058	13	0.00083	essential
Rv1650	pheT	37	0	4.576	37	0	essential
Rv1651c	PE_PGRS30	55	40	5.151	3	0.96873	non-essential
Rv1652	argC	15	0	3.265	15	0.00024	essential
Rv1653	argJ	5	1	1.671	4	0.14626	essential
Rv1654	argB	4	0	1.348	4	0.11883	essential
Rv1655	argD	10	0	2.677	10	0.00505	essential
Rv1656	argF	5	0	1.671	5	0.07631	essential
Rv1657	argR	4	2	1.348	1	0.63211	non-essential
Rv1658	argG	18	0	3.53	18	4e-05	essential
Rv1659	argH	8	0	2.353	8	0.01594	essential
Rv1660	pks10	11	10	2.815	1	0.93607	non-essential
Rv1661	pks7	82	19	5.73	19	8e-05	essential
Rv1662	pks8	67	9	5.437	17	0.00027	essential
Rv1663	pks17	19	4	3.609	12	0.00242	essential
Rv1664	pks9	47	18	4.923	7	0.17142	non-essential
Rv1665	pks11	13	7	3.058	3	0.55913	non-essential
Rv1666c	cyp139	20	14	3.683	1	0.99326	non-essential
Rv1667c	-	11	7	2.815	2	0.74854	non-essential
Rv1668c	-	14	8	3.165	2	0.82743	non-essential
Rv1669	-	9	3	2.524	2	0.6768	non-essential
Rv1670	-	11	7	2.815	2	0.74854	non-essential
Rv1671	-	16	6	3.359	5	0.22432	non-essential
Rv1672c	-	22	12	3.821	4	0.50131	non-essential
Rv1673c	-	16	8	3.359	3	0.63505	non-essential
Rv1674c	-	10	7	2.677	2	0.71492	non-essential
Rv1675c	-	11	7	2.815	4	0.29382	non-essential
Rv1676	-	10	4	2.677	6	0.07661	no-data
Rv1677	dsbF	12	4	2.942	3	0.53046	non-essential
Rv1678	-	10	4	2.677	4	0.27113	non-essential
Rv1679	fadE16	11	3	2.815	3	0.49993	no-data
Rv1680	-	15	8	3.265	3	0.61132	non-essential
Rv1681	moeX	16	14	3.359	1	0.98168	non-essential
Rv1682	-	16	7	3.359	2	0.86574	non-essential
Rv1683	-	41	7	4.725	10	0.02054	essential
Rv1684	-	4	0	1.348	4	0.11883	no-data
Rv1685c	-	7	0	2.16	7	0.02762	non-essential
Rv1686c	-	14	4	3.165	5	0.1993	no-data
Rv1687c	-	12	6	2.942	2	0.7782	non-essential
Rv1688	mpg	9	7	2.524	1	0.8946	non-essential
Rv1689	tyrS	20	0	3.683	20	1e-05	essential
Rv1690	lprJ	8	4	2.353	2	0.63358	non-essential
Rv1691	-	11	5	2.815	4	0.29382	no-data
Rv1692	-	12	10	2.942	1	0.95021	non-essential
Rv1693	-	1	1	-0.664	0	0.39226	non-essential
Rv1694	tlyA	11	5	2.815	5	0.16024	non-essential
Rv1695	ppnK	8	0	2.353	8	0.01594	essential
Rv1696	recN	22	10	3.821	6	0.16083	non-essential
Rv1697	-	18	2	3.53	16	0.00015	essential
Rv1698	-	14	2	3.165	5	0.1993	no-data
Rv1699	pyrG	37	0	4.576	37	0	essential
Rv1700	-	11	1	2.815	5	0.16024	no-data
Rv1701	xerD	15	7	3.265	5	0.21191	essential
Rv1702c	-	24	17	3.947	4	0.53188	non-essential
Rv1703c	-	15	13	3.265	1	0.97648	non-essential
Rv1704c	cycA	21	17	3.754	2	0.92831	non-essential
Rv1705c	PPE22	27	17	4.118	6	0.19361	non-essential
Rv1706A	-	2	0	0.342	2	0.22197	no-data
Rv1706c	PPE23	21	15	3.754	2	0.92831	no-data
Rv1707	-	22	15	3.821	3	0.74993	non-essential
Rv1708	-	19	2	3.609	16	0.00015	essential
Rv1709	-	11	8	2.815	1	0.93607	non-essential
Rv1710	-	15	10	3.265	2	0.84779	non-essential
Rv1711	-	10	0	2.677	10	0.00505	essential
Rv1712	cmk	13	0	3.058	13	0.00083	essential
Rv1713	engA	12	0	2.942	12	0.00153	essential
Rv1714	-	8	5	2.353	2	0.63358	essential
Rv1715	fadB3	10	4	2.677	2	0.71492	essential
Rv1716	-	12	7	2.942	3	0.53046	non-essential
Rv1717	-	4	4	1.348	0	0.86358	non-essential
Rv1718	-	7	6	2.16	1	0.82622	non-essential
Rv1719	-	7	3	2.16	2	0.58459	non-essential
Rv1720c	-	9	6	2.524	2	0.6768	non-essential
Rv1721c	-	2	1	0.342	1	0.39346	non-essential
Rv1722	-	23	19	3.886	2	0.94423	non-essential
Rv1723	-	18	14	3.53	1	0.98889	non-essential
Rv1724c	-	14	9	3.165	2	0.82743	non-essential
Rv1725c	-	13	7	3.058	2	0.80436	non-essential
Rv1726	-	16	11	3.359	3	0.63505	non-essential
Rv1727	-	6	5	1.936	1	0.77686	non-essential
Rv1728c	-	20	12	3.683	2	0.91873	no-data
Rv1729c	-	22	7	3.821	5	0.2948	non-essential
Rv1730c	-	31	13	4.319	7	0.11664	essential
Rv1731	gabD2	25	17	4.007	3	0.79299	non-essential
Rv1732c	-	9	8	2.524	1	0.8946	non-essential
Rv1733c	-	5	3	1.671	1	0.71349	no-data
Rv1734c	-	3	3	0.93	0	0.77553	non-essential
Rv1735c	-	8	5	2.353	2	0.63358	no-data
Rv1736c	narX	42	32	4.76	1	0.99997	no-data
Rv1737c	narK2	15	13	3.265	1	0.97648	non-essential
Rv1738	-	3	3	0.93	0	0.77553	essential
Rv1739c	-	42	28	4.76	3	0.92907	non-essential
Rv1740	-	4	2	1.348	2	0.39468	non-essential
Rv1741	-	7	5	2.16	1	0.82622	non-essential
Rv1742	-	14	12	3.165	1	0.9698	non-essential
Rv1743	pknE	34	21	4.453	3	0.88258	non-essential
Rv1744c	-	8	6	2.353	1	0.86466	non-essential
Rv1745c	idi	13	7	3.058	4	0.3371	non-essential
Rv1746	pknF	13	12	3.058	1	0.96122	non-essential
Rv1747	-	34	24	4.453	2	0.98598	non-essential
Rv1748	-	13	9	3.058	2	0.80436	non-essential
Rv1749c	-	16	12	3.359	1	0.98168	non-essential
Rv1750c	fadD1	40	24	4.689	4	0.71777	non-essential
Rv1751	-	19	10	3.609	4	0.45168	no-data
Rv1752	-	5	4	1.671	1	0.71349	non-essential
Rv1753c	PPE24	67	17	5.437	12	0.00851	essential
Rv1754c	-	41	24	4.725	6	0.27875	non-essential
Rv1755c	plcD	19	3	3.609	6	0.14052	non-essential
Rv1756c	-	1	0	-0.664	1	0.2212	no-data
Rv1757c	-	n/a	n/a	n/a	n/a	n/a	n/a
Rv1758	cut1	12	8	2.942	3	0.53046	non-essential
Rv1759c	wag22	27	16	4.118	4	0.57425	non-essential
Rv1760	-	28	18	4.171	4	0.5875	non-essential
Rv1761c	-	6	4	1.936	1	0.77686	non-essential
Rv1762c	-	10	7	2.677	2	0.71492	non-essential
Rv1763	-	n/a	n/a	n/a	n/a	n/a	n/a
Rv1764	-	n/a	n/a	n/a	n/a	n/a	n/a
Rv1765A	-	4	4	1.348	0	0.86358	no-data
Rv1765c	-	1	1	-0.664	0	0.39226	no-data
Rv1766	-	3	2	0.93	1	0.52763	no-data
Rv1767	-	8	5	2.353	2	0.63358	no-data
Rv1768	PE_PGRS31	21	19	3.754	1	0.99475	no-data
Rv1769	-	23	17	3.886	2	0.94423	no-data
Rv1770	-	17	14	3.447	2	0.88157	no-data
Rv1771	-	26	18	4.064	2	0.96172	no-data
Rv1772	-	5	1	1.671	2	0.46607	no-data
Rv1773c	-	11	6	2.815	5	0.16024	no-data
Rv1774	-	30	22	4.271	1	0.99945	non-essential
Rv1775	-	14	10	3.165	1	0.9698	non-essential
Rv1776c	-	12	5	2.942	2	0.7782	non-essential
Rv1777	cyp144	28	13	4.171	4	0.5875	non-essential
Rv1778c	-	6	2	1.936	3	0.31477	non-essential
Rv1779c	-	15	8	3.265	4	0.37774	no-data
Rv1780	-	14	11	3.165	2	0.82743	non-essential
Rv1781c	malQ	27	20	4.118	1	0.99883	non-essential
Rv1782	-	20	6	3.683	10	0.01007	no-data
Rv1783	-	18	0	3.53	18	4e-05	no-data
Rv1784	-	42	7	4.76	11	0.01061	no-data
Rv1785c	cyp143	22	13	3.821	3	0.74993	non-essential
Rv1786	-	1	1	-0.664	0	0.39226	non-essential
Rv1787	PPE25	10	3	2.677	3	0.46741	non-essential
Rv1788	PE18	6	6	1.936	0	0.94961	non-essential
Rv1789	PPE26	21	15	3.754	2	0.92831	no-data
Rv1790	PPE27	9	6	2.524	3	0.43278	no-data
Rv1791	PE19	6	1	1.936	3	0.31477	no-data
Rv1793	esxN	2	2	0.342	0	0.63065	non-essential
Rv1794	-	22	7	3.821	6	0.16083	no-data
Rv1795	-	23	7	3.886	8	0.04514	no-data
Rv1796	mycP5	34	14	4.453	5	0.41713	no-data
Rv1797	-	15	2	3.265	8	0.02968	no-data
Rv1798	-	31	14	4.319	6	0.21891	non-essential
Rv1799	lppT	2	1	0.342	1	0.39346	non-essential
Rv1800	PPE28	40	28	4.689	3	0.91954	no-data
Rv1801	PPE29	26	21	4.064	2	0.96172	no-data
Rv1802	PPE30	22	18	3.821	1	0.99591	no-data
Rv1803c	PE_PGRS32	35	21	4.495	5	0.42631	no-data
Rv1804c	-	10	5	2.677	4	0.27113	non-essential
Rv1805c	-	6	2	1.936	4	0.17284	non-essential
Rv1806	PE20	6	2	1.936	3	0.31477	no-data
Rv1807	PPE31	21	9	3.754	4	0.48529	no-data
Rv1808	PPE32	29	26	4.222	1	0.99929	no-data
Rv1809	PPE33	24	12	3.947	4	0.53188	no-data
Rv1810	-	13	10	3.058	1	0.96122	non-essential
Rv1811	mgtC	16	14	3.359	1	0.98168	non-essential
Rv1812c	-	24	18	3.947	1	0.99752	non-essential
Rv1813c	-	10	9	2.677	1	0.91791	non-essential
Rv1814	erg3	25	21	4.007	1	0.99807	non-essential
Rv1815	-	9	8	2.524	1	0.8946	non-essential
Rv1816	-	15	8	3.265	2	0.84779	non-essential
Rv1817	-	30	26	4.271	1	0.99945	non-essential
Rv1818c	PE_PGRS33	17	9	3.447	5	0.23654	non-essential
Rv1819c	-	34	29	4.453	2	0.98598	non-essential
Rv1820	ilvG	20	16	3.683	1	0.99326	non-essential
Rv1821	secA2	39	9	4.652	19	4e-05	non-essential
Rv1822	pgsA2	17	1	3.447	16	0.00014	no-data
Rv1823	-	16	10	3.359	3	0.63505	non-essential
Rv1824	-	5	4	1.671	1	0.71349	growth-defect
Rv1825	-	10	9	2.677	1	0.91791	non-essential
Rv1826	gcvH	9	0	2.524	9	0.00903	non-essential
Rv1827	cfp17	8	0	2.353	8	0.01594	no-data
Rv1828	-	14	0	3.165	14	0.00045	essential
Rv1829	-	10	8	2.677	1	0.91791	non-essential
Rv1830	-	12	1	2.942	11	0.00304	non-essential
Rv1831	-	5	4	1.671	1	0.71349	non-essential
Rv1832	gcvB	58	1	5.228	57	0	essential
Rv1833c	-	14	9	3.165	2	0.82743	non-essential
Rv1834	-	13	8	3.058	2	0.80436	non-essential
Rv1835c	-	42	36	4.76	2	0.99486	non-essential
Rv1836c	-	42	2	4.76	31	0	no-data
Rv1837c	glcB	27	1	4.118	25	0	non-essential
Rv1838c	-	10	9	2.677	1	0.91791	non-essential
Rv1839c	-	2	2	0.342	0	0.63065	non-essential
Rv1840c	PE_PGRS34	17	8	3.447	6	0.12671	non-essential
Rv1841c	-	13	9	3.058	4	0.3371	non-essential
Rv1842c	-	16	11	3.359	2	0.86574	non-essential
Rv1843c	guaB1	23	20	3.886	2	0.94423	non-essential
Rv1844c	gnd1	18	17	3.53	1	0.98889	non-essential
Rv1845c	-	15	3	3.265	9	0.01501	growth-defect
Rv1846c	-	3	3	0.93	0	0.77553	non-essential
Rv1847	-	6	3	1.936	1	0.77686	non-essential
Rv1848	ureA	2	2	0.342	0	0.63065	non-essential
Rv1849	ureB	6	1	1.936	5	0.09086	non-essential
Rv1850	ureC	19	13	3.609	2	0.90786	essential
Rv1851	ureF	2	1	0.342	1	0.39346	no-data
Rv1852	ureG	6	3	1.936	1	0.77686	non-essential
Rv1853	ureD	7	3	2.16	1	0.82622	non-essential
Rv1854c	ndh	20	1	3.683	19	2e-05	no-data
Rv1855c	-	15	13	3.265	2	0.84779	non-essential
Rv1856c	-	5	3	1.671	1	0.71349	non-essential
Rv1857	modA	6	5	1.936	1	0.77686	non-essential
Rv1858	modB	23	20	3.886	1	0.99682	non-essential
Rv1859	modC	16	12	3.359	1	0.98168	non-essential
Rv1860	apa	16	12	3.359	1	0.98168	non-essential
Rv1861	-	8	3	2.353	5	0.11928	non-essential
Rv1862	adhA	15	13	3.265	1	0.97648	non-essential
Rv1863c	-	10	8	2.677	1	0.91791	non-essential
Rv1864c	-	10	8	2.677	1	0.91791	non-essential
Rv1865c	-	13	11	3.058	1	0.96122	non-essential
Rv1866	-	35	16	4.495	6	0.24342	non-essential
Rv1867	-	21	13	3.754	2	0.92831	non-essential
Rv1868	-	33	23	4.41	3	0.87494	non-essential
Rv1869c	-	25	19	4.007	2	0.95661	non-essential
Rv1870c	-	13	10	3.058	2	0.80436	non-essential
Rv1871c	-	9	8	2.524	1	0.8946	non-essential
Rv1872c	lldD2	14	9	3.165	2	0.82743	non-essential
Rv1873	-	11	11	2.815	0	0.99582	non-essential
Rv1874	-	12	11	2.942	1	0.95021	non-essential
Rv1875	-	5	5	1.671	0	0.91709	non-essential
Rv1876	bfrA	10	8	2.677	1	0.91791	non-essential
Rv1877	-	34	31	4.453	1	0.9998	non-essential
Rv1878	glnA3	28	18	4.171	2	0.97022	non-essential
Rv1879	-	20	14	3.683	2	0.91873	non-essential
Rv1880c	cyp140	16	12	3.359	2	0.86574	non-essential
Rv1881c	lppE	8	7	2.353	1	0.86466	non-essential
Rv1882c	-	16	14	3.359	1	0.98168	non-essential
Rv1883c	-	6	6	1.936	0	0.94961	non-essential
Rv1884c	rpfC	6	5	1.936	1	0.77686	non-essential
Rv1885c	-	14	9	3.165	3	0.58605	non-essential
Rv1886c	fbpB	24	18	3.947	2	0.9508	non-essential
Rv1887	-	26	17	4.064	4	0.56057	non-essential
Rv1888A	-	1	0	-0.664	1	0.2212	no-data
Rv1888c	-	19	11	3.609	3	0.6979	non-essential
Rv1889c	-	4	2	1.348	2	0.39468	non-essential
Rv1890c	-	8	6	2.353	1	0.86466	non-essential
Rv1891	-	9	8	2.524	1	0.8946	non-essential
Rv1892	-	8	5	2.353	3	0.39589	non-essential
Rv1893	-	1	0	-0.664	1	0.2212	non-essential
Rv1894c	-	14	11	3.165	2	0.82743	non-essential
Rv1895	-	19	14	3.609	1	0.99135	non-essential
Rv1896c	-	20	10	3.683	6	0.14734	non-essential
Rv1897c	-	5	4	1.671	1	0.71349	non-essential
Rv1898	-	4	3	1.348	1	0.63211	non-essential
Rv1899c	lppD	11	10	2.815	1	0.93607	non-essential
Rv1900c	lipJ	25	18	4.007	2	0.95661	non-essential
Rv1901	cinA	19	15	3.609	1	0.99135	non-essential
Rv1902c	nanT	34	22	4.453	4	0.6588	non-essential
Rv1903	-	6	6	1.936	0	0.94961	non-essential
Rv1904	-	10	9	2.677	1	0.91791	non-essential
Rv1905c	aao	19	17	3.609	1	0.99135	non-essential
Rv1906c	-	10	5	2.677	3	0.46741	non-essential
Rv1907c	-	10	6	2.677	1	0.91791	non-essential
Rv1908c	katG	39	0	4.652	39	0	non-essential
Rv1909c	furA	12	3	2.942	7	0.04688	non-essential
Rv1910c	-	13	10	3.058	1	0.96122	non-essential
Rv1911c	lppC	8	6	2.353	1	0.86466	non-essential
Rv1912c	fadB5	14	9	3.165	2	0.82743	non-essential
Rv1913	-	11	5	2.815	2	0.74854	non-essential
Rv1914c	-	7	5	2.16	1	0.82622	non-essential
Rv1915	aceAa	21	16	3.754	2	0.92831	non-essential
Rv1916	aceAb	18	14	3.53	2	0.89554	no-data
Rv1917c	PPE34	106	44	6.103	15	0.00171	non-essential
Rv1918c	PPE35	76	27	5.62	25	0	non-essential
Rv1919c	-	7	6	2.16	1	0.82622	non-essential
Rv1920	-	13	10	3.058	2	0.80436	non-essential
Rv1921c	lppF	22	19	3.821	1	0.99591	non-essential
Rv1922	-	21	15	3.754	2	0.92831	non-essential
Rv1923	lipD	34	28	4.453	2	0.98598	non-essential
Rv1924c	-	12	11	2.942	1	0.95021	non-essential
Rv1925	fadD31	39	25	4.652	2	0.99251	non-essential
Rv1926c	mpt63	9	6	2.524	2	0.6768	non-essential
Rv1927	-	17	14	3.447	1	0.98573	non-essential
Rv1928c	-	19	14	3.609	1	0.99135	non-essential
Rv1929c	-	9	6	2.524	1	0.8946	non-essential
Rv1930c	-	6	2	1.936	3	0.31477	no-data
Rv1931c	-	5	1	1.671	3	0.27021	non-essential
Rv1932	tpx	9	6	2.524	1	0.8946	non-essential
Rv1933c	fadE18	10	7	2.677	2	0.71492	no-data
Rv1934c	fadE17	12	10	2.942	2	0.7782	non-essential
Rv1935c	echA13	10	9	2.677	1	0.91791	non-essential
Rv1936	-	18	17	3.53	1	0.98889	non-essential
Rv1937	-	49	26	4.983	6	0.3233	non-essential
Rv1938	ephB	17	9	3.447	3	0.65733	non-essential
Rv1939	-	5	1	1.671	3	0.27021	no-data
Rv1940	ribA1	9	6	2.524	3	0.43278	non-essential
Rv1941	-	4	3	1.348	1	0.63211	no-data
Rv1942c	-	2	1	0.342	1	0.39346	no-data
Rv1943c	-	10	3	2.677	7	0.03922	non-essential
Rv1944c	-	8	5	2.353	2	0.63358	non-essential
Rv1945	-	11	4	2.815	4	0.29382	non-essential
Rv1946c	lppG	7	5	2.16	2	0.58459	non-essential
Rv1947	-	6	5	1.936	1	0.77686	non-essential
Rv1948c	-	16	7	3.359	3	0.63505	non-essential
Rv1949c	-	21	14	3.754	3	0.73366	non-essential
Rv1950c	-	5	5	1.671	0	0.91709	non-essential
Rv1951c	-	6	4	1.936	1	0.77686	non-essential
Rv1952	-	2	2	0.342	0	0.63065	non-essential
Rv1953	-	13	7	3.058	3	0.55913	non-essential
Rv1954c	-	7	7	2.16	0	0.96938	non-essential
Rv1955	-	7	5	2.16	2	0.58459	no-data
Rv1956	-	8	5	2.353	2	0.63358	non-essential
Rv1957	-	13	8	3.058	1	0.96122	growth-defect
Rv1958c	-	10	4	2.677	3	0.46741	non-essential
Rv1959c	-	7	5	2.16	2	0.58459	non-essential
Rv1960c	-	4	3	1.348	1	0.63211	non-essential
Rv1961	-	9	7	2.524	1	0.8946	non-essential
Rv1962c	-	14	10	3.165	1	0.9698	non-essential
[truncated: 1,995 more rows]
