# Supplementary material for: High-Resolution Phenotypic Profiling Defines Genes Essential for Mycobacterial Growth and Cholesterol Catabolism
Source: PLoS Pathog. 2011 Sep 29;7(9):e1002251. doi: 10.1371/journal.ppat.1002251 (PMC3182942; doi:10.1371/journal.ppat.1002251)
Supplement: Table S4 — Genes required for growth in cholesterol (XLSX) [file ppat.1002251.s004.xlsx]

## Sheet: Table 1
Table S4. Genes predicted to be specifically required for growth on cholesterol
"Ratio glycerol/cholesterol" = mean of sequence reads per detected insertion in cholesterol pools / mean of sequence reads per detected insertion in glycerol pools
"p value" = significance of the ratio measurement. Determined as described in materials and methods section.
		Ratio
Locus	synonym	cholesterol/glycerol	p value
Rv0009	ppiA	0.269221	0.00315027
Rv0153c	ptbB	0.0233212	0.0525375
Rv0202c	mmpL11	0.122269	0.000832112
Rv0244c	fadE5	0.132814	1.14589e-09
Rv0362	mgtE	0.00543633	1.37019e-07
Rv0391	metZ	0.0725097	0.000472349
Rv0450c	mmpL4	0.209782	2.60696e-11
Rv0485	-	0.019747	5.44134e-10
Rv0495c	-	0.0812748	0.00236372
Rv0655	mkl	0.14851	0.00136689
Rv0693	pqqE	0.0617361	0.00235059
Rv0694	lldD1	0.0579552	0.00657211
Rv0695	-	0.146571	0.0106711
Rv0696	-	0.0616158	0.0152699
Rv0761c	adhB	0.0512889	0.00598015
Rv0805	-	0.105001	0.00677181
Rv0876c	-	0.420792	0.00112995
Rv1071c	echA9	0.347306	0.00291703
Rv1084	-	0.428	0.000666963
Rv1096	-	0.119579	0.00639477
Rv1129c	-	0.014928	7.20734e-05
Rv1130	-	0.0127195	2.4975e-08
Rv1131	gltA1	0.0563458	0.00503471
Rv1183	mmpL10	0.148508	2.307e-06
Rv1193	fadD36	0.0635402	0.00623063
Rv1428c	-	0.123871	5.05288e-06
Rv1432	-	0.022675	0.00879474
Rv1608c	bcpB	0.144996	0.00596773
Rv1626	-	0.0140026	1.06208e-05
Rv1627c	-	0.0848187	1.90892e-06
Rv1798	-	0.0556356	0.00309895
Rv1906c	-	0.0616409	0.0098043
Rv1919c	-	0.194073	0.00636366
Rv1963c	mce3R	0.0571929	0.000486813
Rv2048c	pks12	0.152225	0.000461945
Rv2118c	-	0.323034	0.000703129
Rv2206	-	0.0134118	0.0326366
Rv2239c	-	0.0154556	0.0292216
Rv2416c	eis	0.395699	0.000854908
Rv2462c	tig	0.259895	6.75985e-05
Rv2506	-	0.233074	0.000123914
Rv2668	-	0.204799	0.000912089
Rv2681	-	0.570827	1.39282e-05
Rv2684	arsA	0.0730954	6.60586e-06
Rv2710	sigB	0.131649	0.00383893
Rv2799	-	0.262259	0.000993845
Rv2914c	pknI	0.436636	9.68708e-05
Rv2985	mutT1	0.334336	0.00226378
Rv3050c	-	0.0255341	0.0545675
Rv3274c	fadE25	0.268343	0.00105052
Rv3419c	gcp	0.0319919	0.0285801
Rv3421c	-	0.0517202	0.0415881
Rv3492c	-	0.0274277	0.00415122
Rv3493c	-	0.0147051	0.000977444
Rv3494c	mce4F	0.00739707	1.01815e-10
Rv3495c	lprN	0.0445103	0.000974754
Rv3496c	mce4D	0.0429754	4.64976e-08
Rv3497c	mce4C	0.0446315	4.36214e-09
Rv3498c	mce4B	0.0599041	0.000572803
Rv3499c	mce4A	0.0440323	2.23035e-09
Rv3500c	yrbE4B	0.0161651	1.06764e-05
Rv3501c	yrbE4A	0.00870019	0.000429682
Rv3502c	hsd4A	0.00363472	0.000174399
Rv3515c	fadD19	0.267712	0.000117357
Rv3526	kshA	0.00631385	2.35763e-07
Rv3531c	-	0.27923	0.000104647
Rv3534c	hsaF	0.224842	0.00281106
Rv3536c	hsaE	0.202097	0.00453067
Rv3537	kstD	0.109116	0.000121739
Rv3540c	ltp2	0.0145315	0.000882742
Rv3542c	-	0.0539945	0.00181935
Rv3543c	fadE29	0.0232257	0.00395497
Rv3544c	fadE28	0.0062221	1.63379e-07
Rv3545c	cyp125	0.269213	0.000282855
Rv3546	fadA5	0.0403484	4.04084e-07
Rv3548c	-	0.0104227	9.25008e-05
Rv3549c	-	0.00444502	0.000138934
Rv3551	-	0.00714206	2.54104e-05
Rv3553	-	0.0206392	0.000428435
Rv3559c	-	0.0164275	0.0367624
Rv3560c	fadE30	0.00621365	9.98808e-05
Rv3561	fadD3	0.218243	0.00121496
Rv3563	fadE32	0.0957732	8.83821e-06
Rv3564	fadE33	0.0205348	0.0195599
Rv3568c	hsaC	0.011177	0.000634221
Rv3569c	hsaD	0.0231432	0.00010739
Rv3570c	hsaA	0.067265	0.0035659
Rv3571	kshB	0.00816383	0.000362888
Rv3572	-	0.392241	0.00155348
Rv3573c	fadE34	0.245116	0.00623532
Rv3575c	-	0.233738	3.89851e-05
Rv3779	-	0.402942	0.00131135
Rv3820c	papA2	0.376097	1.04145e-05
Rv3824c	papA1	0.431294	0.000266992
Rv3825c	pks2	0.399653	3.80118e-16
Rv3911	sigM	0.258092	0.00298627
